# Supplementary material for: Metal-free regioselective direct thiolation of 2-pyridones
Source: Royal Society of Chemistry journal article supplement (doi:10.1039/c9ob01061k), 2019-01-01

## Supplementary Information

### Metal-Free Regioselective Direct Thiolation of 2-Pyridones

Kunita Phakdeeyothin and Sirilata Yotphan\*

*Department of Chemistry and Center of Excellence for Innovation in Chemistry,  
Faculty of Science, Mahidol University, Bangkok 10400, Thailand  
E-mail: [sirilata.yot@mahidol.ac.th](mailto:sirilata.yot@mahidol.ac.th)*

#### Table of Contents

|      |                                                      |     |
|------|------------------------------------------------------|-----|
| I.   | Substrate Preparation                                | S-2 |
| II.  | Additional Control Experiments                       | S-3 |
| III. | $^1\text{H}$ and $^{13}\text{C}$ Spectra of Products | S-4 |

## I. Substrate Preparation

### General Procedure for the Preparation of *N*-Alkylated Pyridone Substrates:

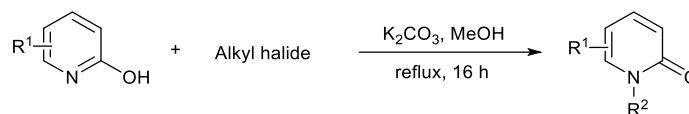

To a suspension of 2-hydroxypyridine (5 mmol, 1 equiv.) in MeOH (20 mL),  $K_2CO_3$  (7.5 mmol, 1.5 equiv.) and alkyl halide (7.5 mmol, 1.5 equiv.) were added. The reaction mixture was heated to reflux for 16 h. Upon completion, the solvent was evaporated, distilled deionized  $H_2O$  (20 mL) was added, and the mixture was extracted with ethyl acetate (EtOAc) ( $2 \times 20$  mL). The combined organic layers were dried over anhydrous  $Na_2SO_4$ , filtered and concentrated under reduced pressure. The resulting organic residue was purified by flash chromatography column over silica gel ( $SiO_2$ ) to afford the *N*-alkylated pyridones.

The *N*-alkylated pyridone substrates employed in this work are known compounds and their  $^1H$  NMR data agreed with the literature.

### General Procedure for the Preparation of *N*-Arylated Pyridone Substrates:

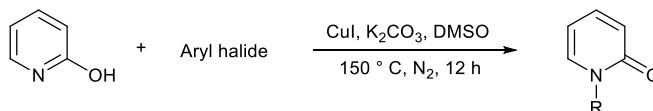

The mixture of 2-hydroxypyridine (5 mmol, 1 equiv.), Aryl halides (10 mmol, 2 equiv.), CuI (0.5 mmol, 0.1 equiv.) and  $K_2CO_3$  (5 mmol, 1 equiv.) in DMSO (10 ml) was heated and stirred at 150 °C for 12 h under a nitrogen atmosphere. Upon completion, distilled deionized  $H_2O$  (5 mL) was added, and the mixture was extracted with ethyl acetate (EtOAc) ( $2 \times 20$  mL). The combined organic layers were dried over anhydrous  $Na_2SO_4$ , filtered and concentrated under reduced pressure. The resulting organic residue was purified by flash chromatography column over silica gel ( $SiO_2$ ) to afford the *N*-arylated pyridones.

The *N*-arylated pyridone substrates employed in this work are known compounds and their  $^1H$  NMR data agreed with the literature.

(Reference: A. Modak, S. Rana and D. Maiti, *J. Org. Chem.*, 2015, **80**, 296.

## II. Additional Control Experiments

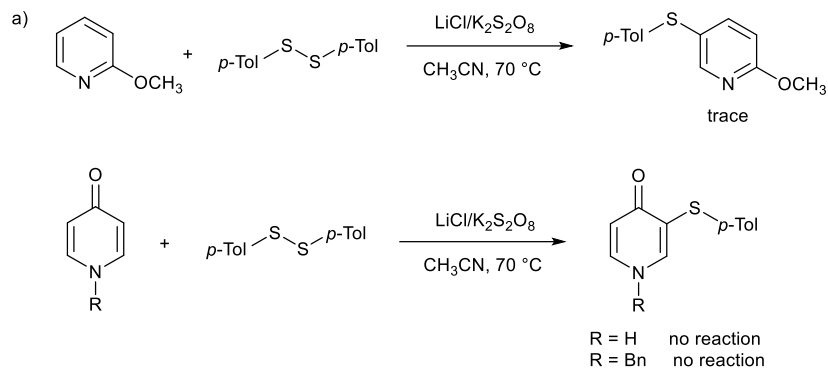

According to the results from the above control experiments (a), 2-methoxypyridine as well as 4-pyridones were not suitable substrates for this transformation. Thus, the lactam tautomeric form is essential for the reaction to take place.

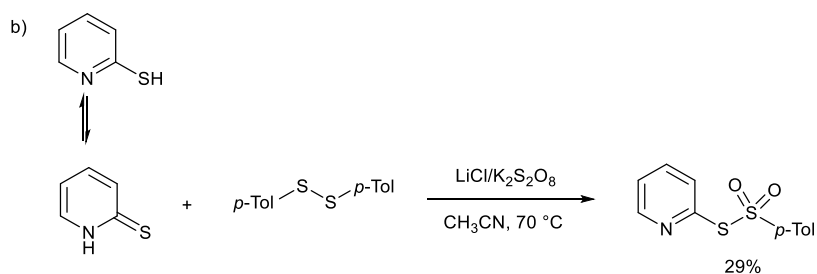

Furthermore, 2-mercaptopyridine (or 2-pyridinethione) was not capable of reacting as a nucleophile with disulfide in this reaction. Instead, a small amount of *S*-(pyridin-2-yl) 4-methylbenzenesulfonylthioate was formed (confirmed by LCMS and NMR).

### III. $^1\text{H}$ and $^{13}\text{C}$ Spectra of Products

#### 1-Methyl-5-(*p*-tolylthio)pyridin-2(1*H*)-one (3a)

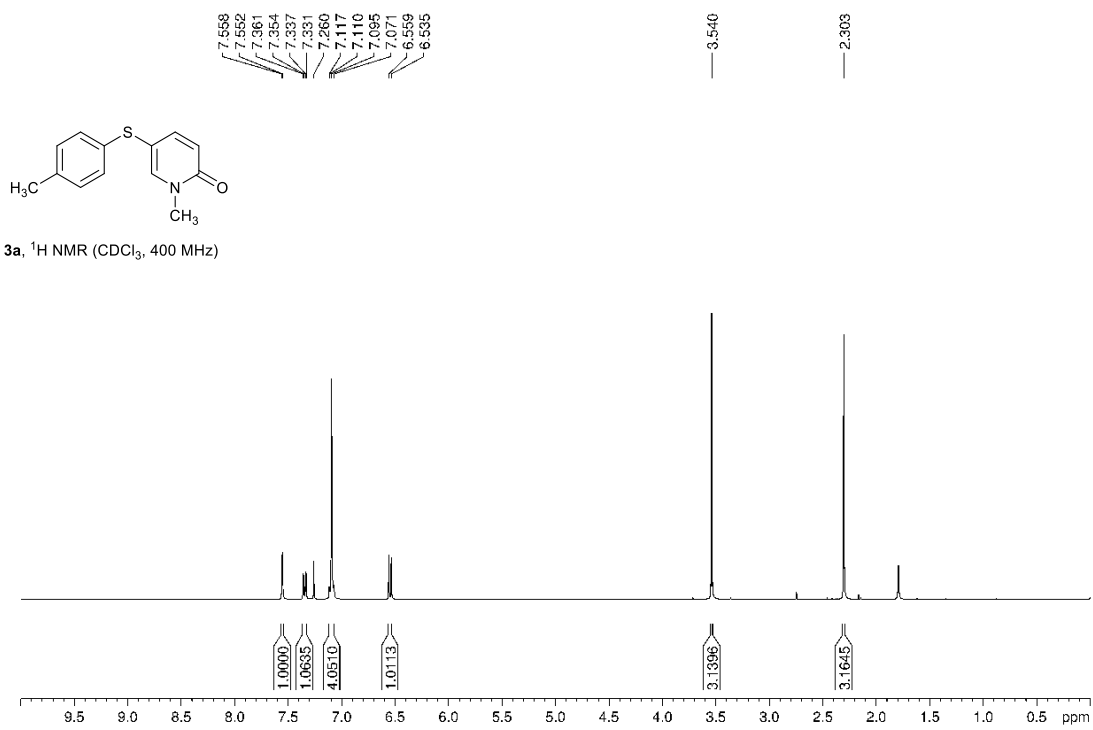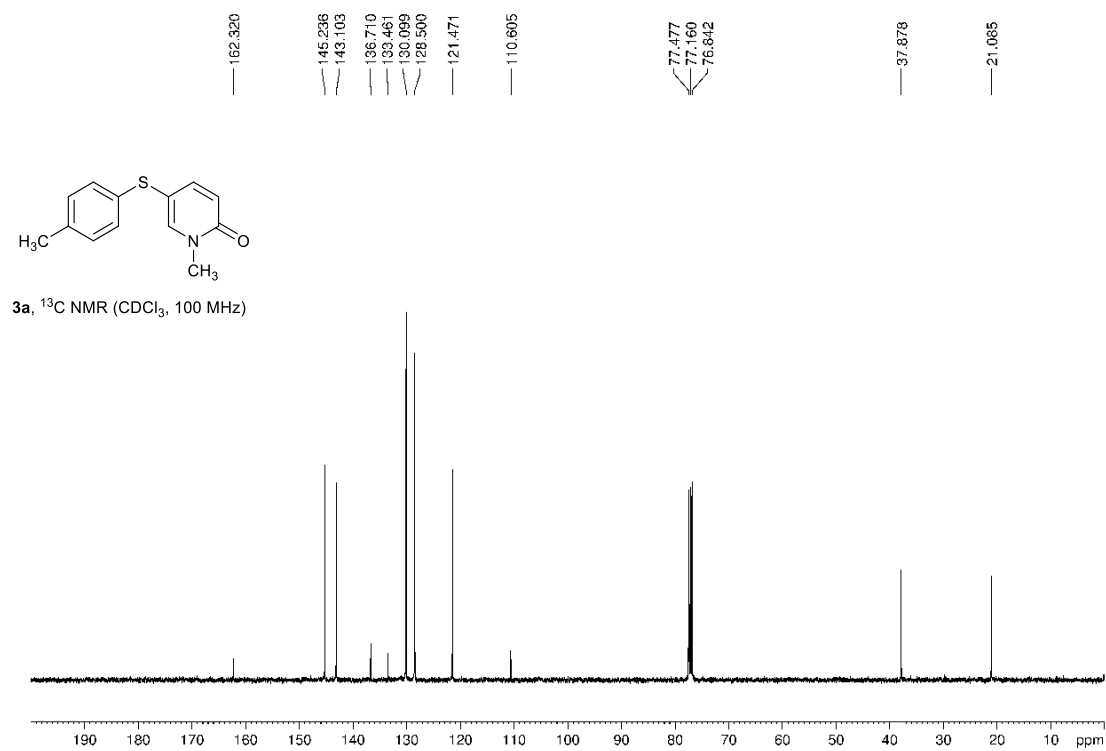

### 1-Ethyl-5-(*p*-tolylthio)pyridin-2(1*H*)-one (3b)

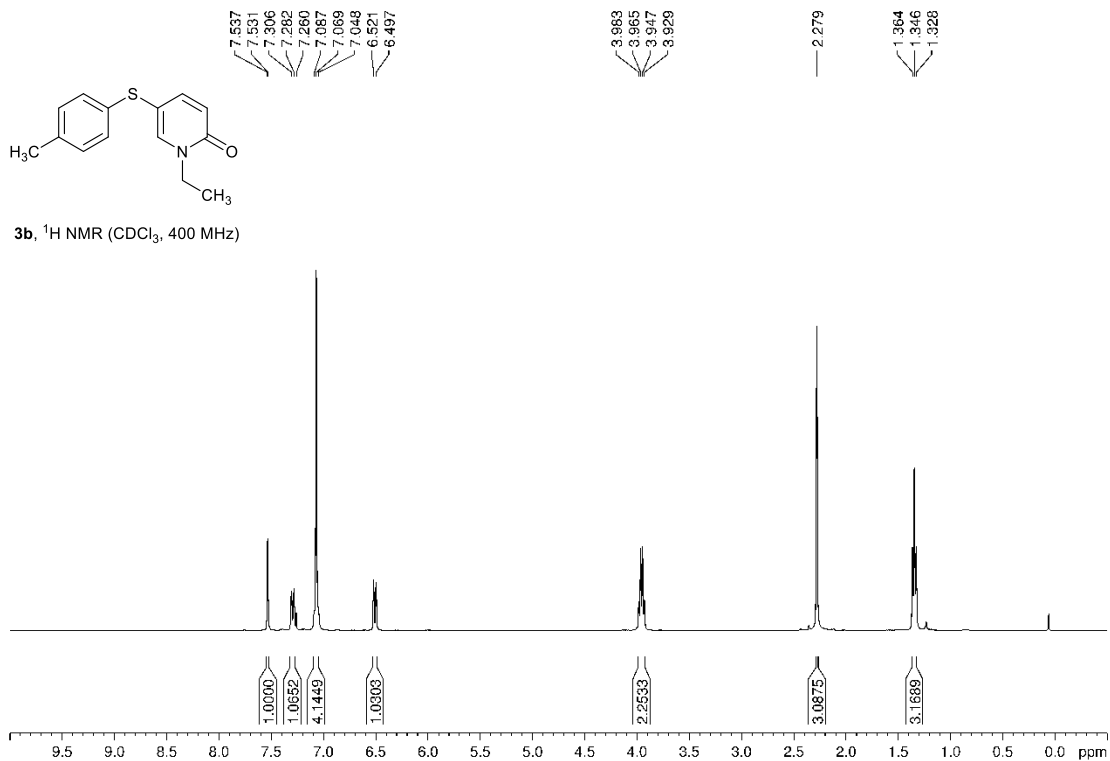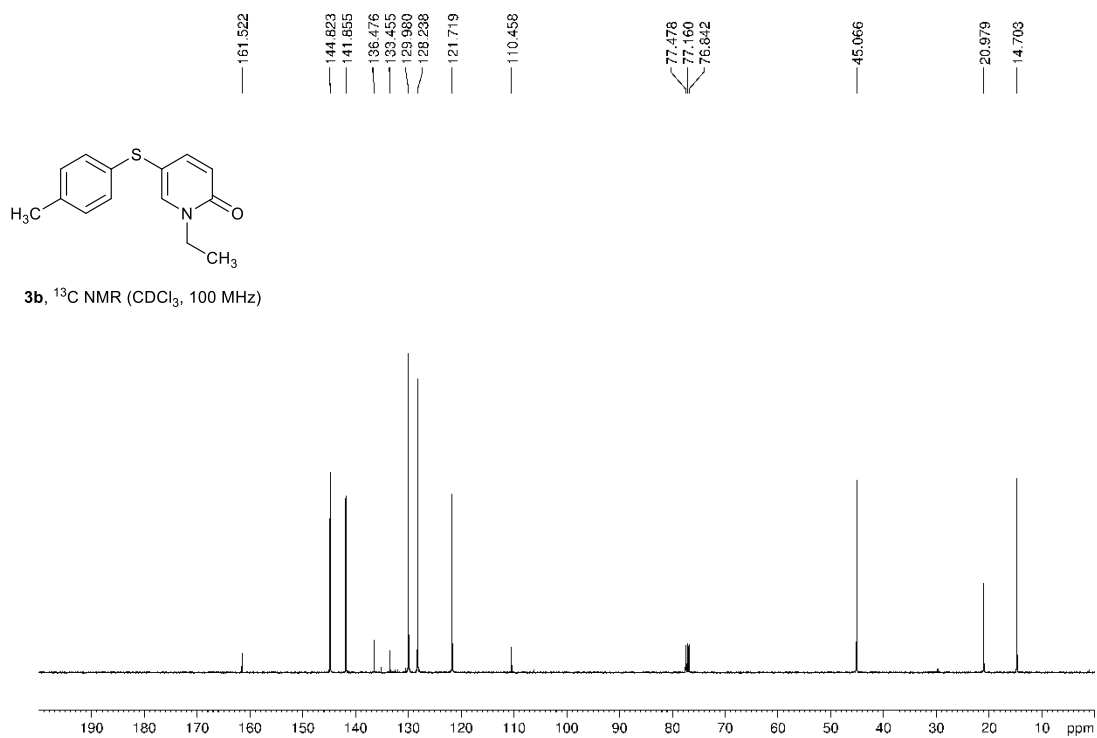

### 1-Isopropyl-5-(*p*-tolylthio)pyridin-2(1*H*)-one (3c)

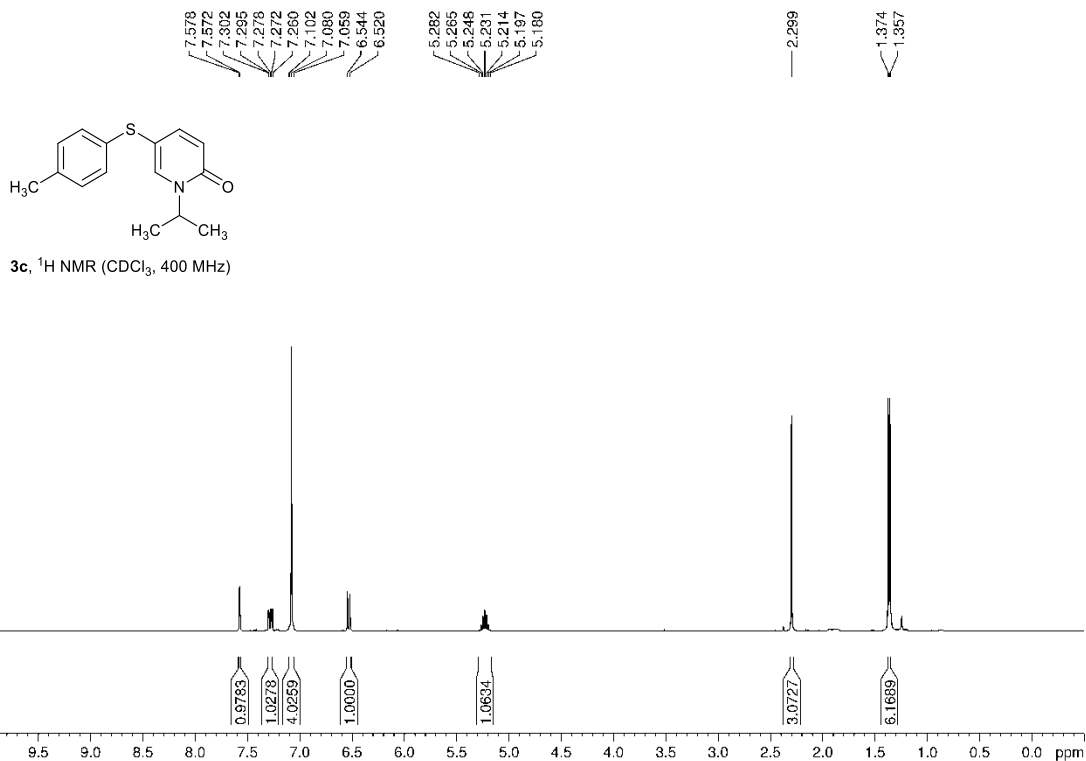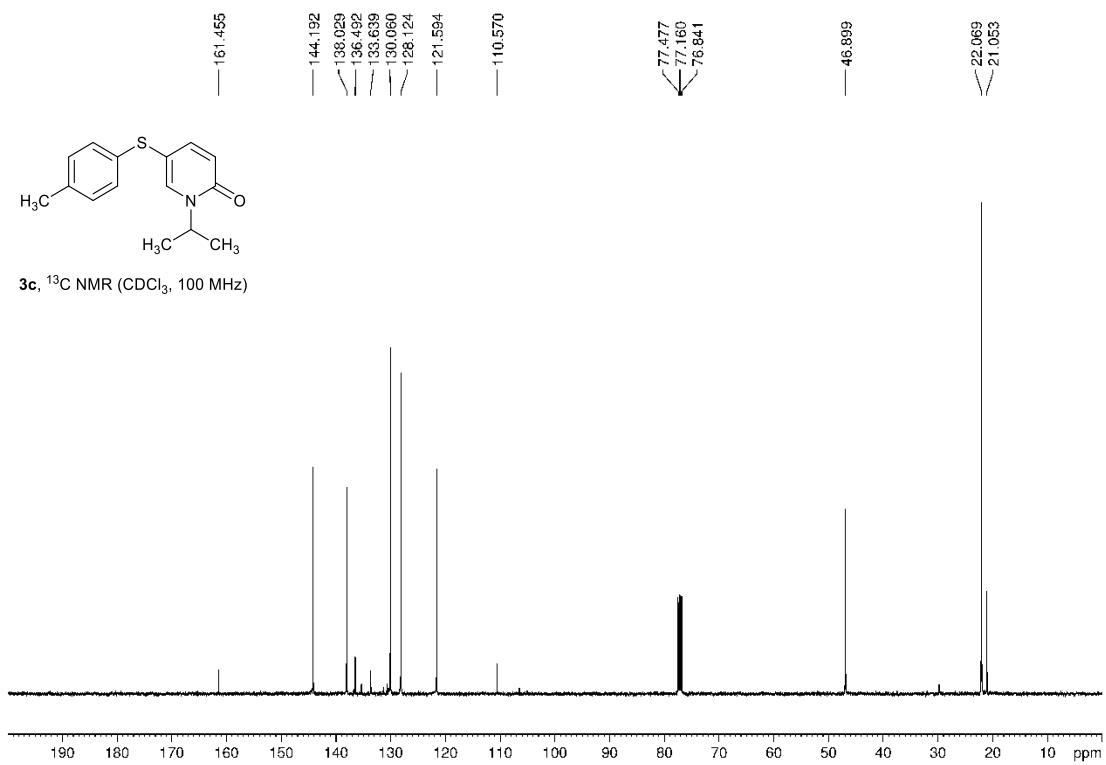

# 1-Pentyl-5-(*p*-tolylthio)pyridin-2(1*H*)-one (3d)

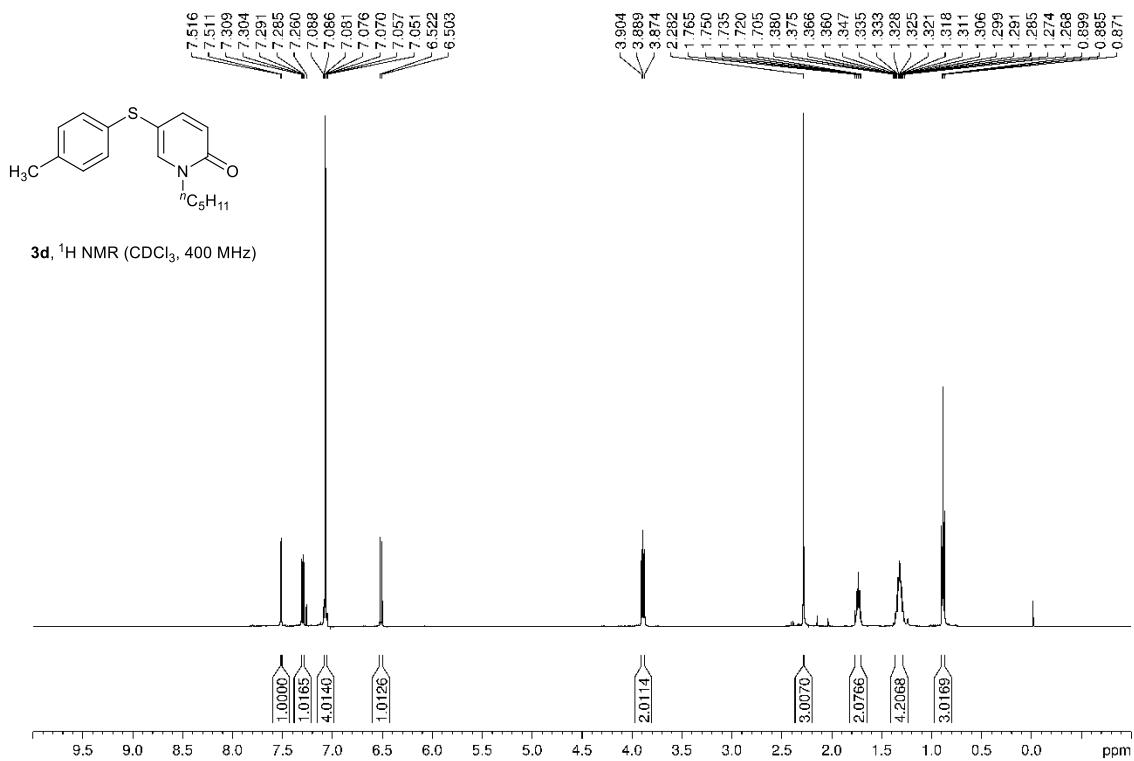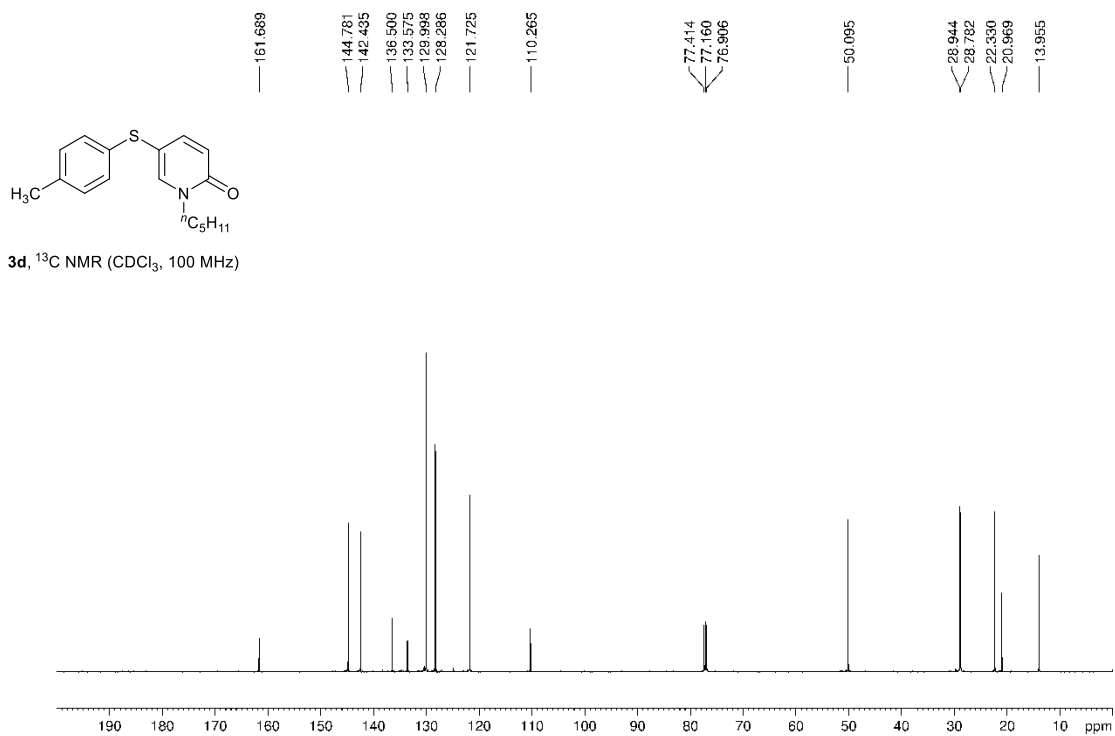

# 1-Benzyl-5-(*p*-tolylthio)pyridin-2(1*H*)-one (3e)

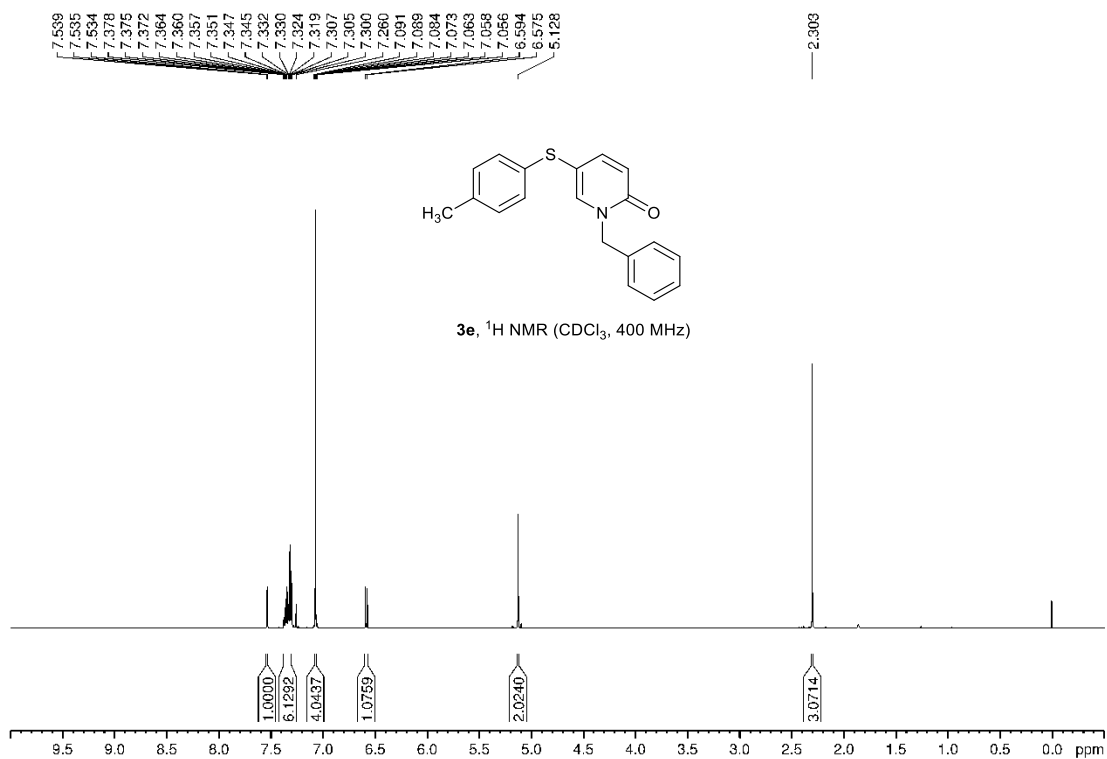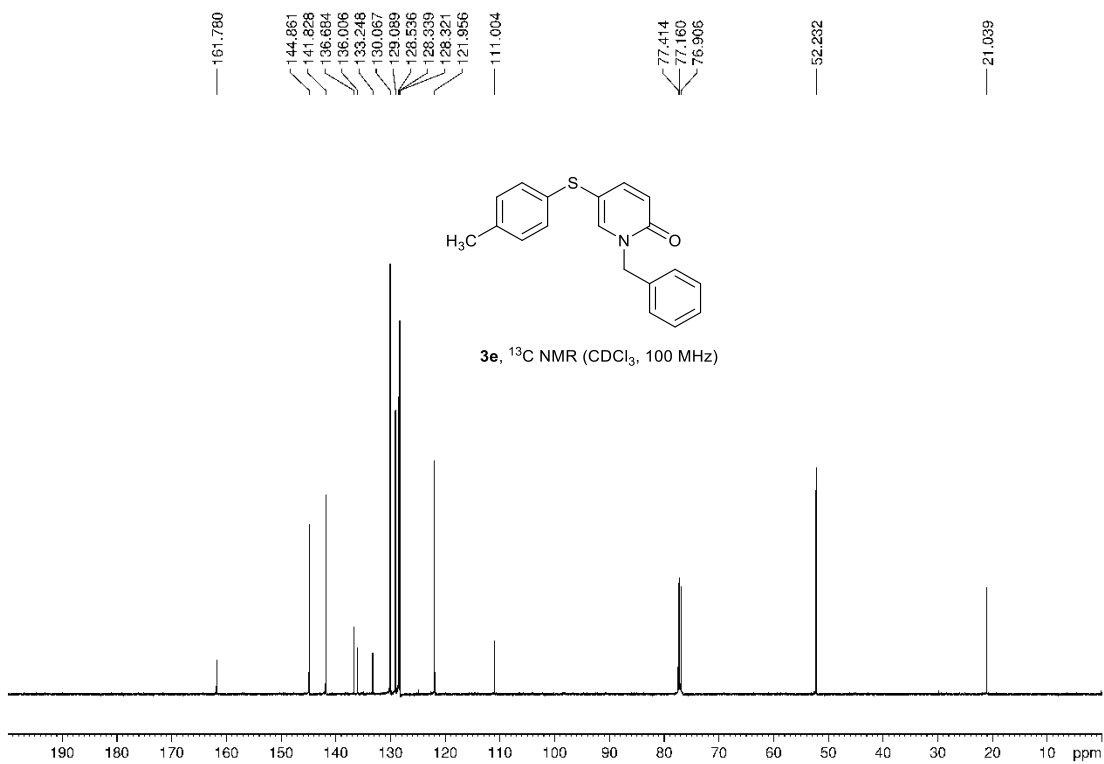



### 5-(*p*-Tolylthio)pyridin-2(1*H*)-one (3f)

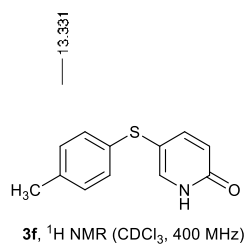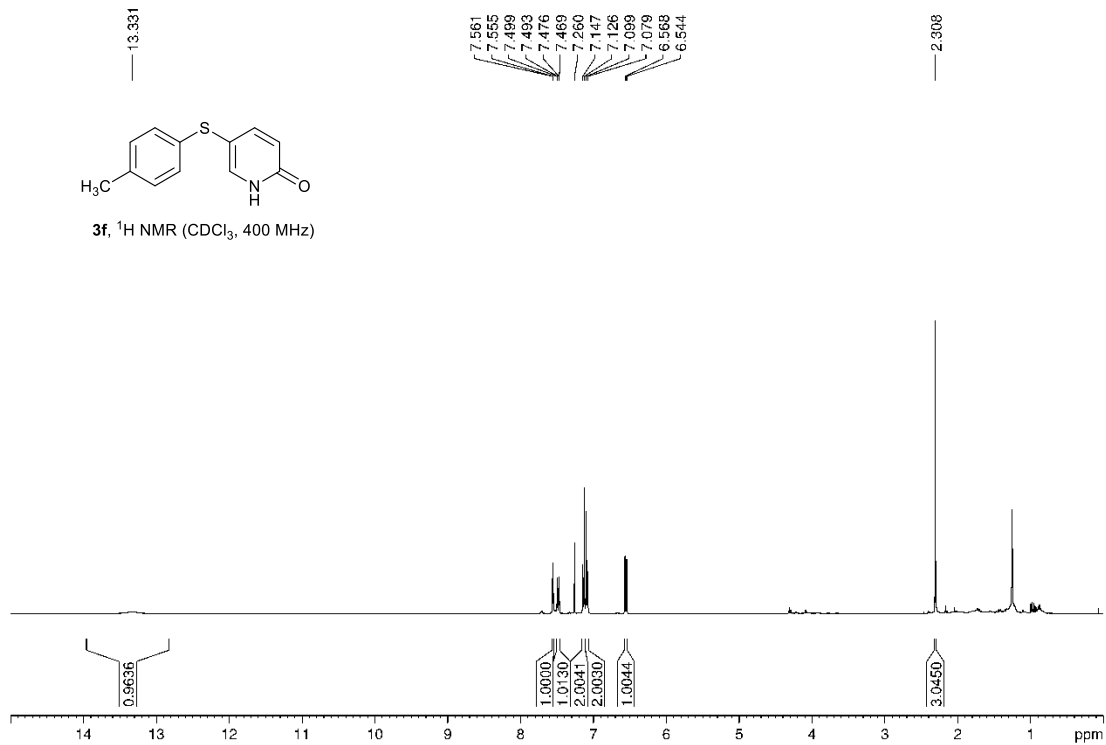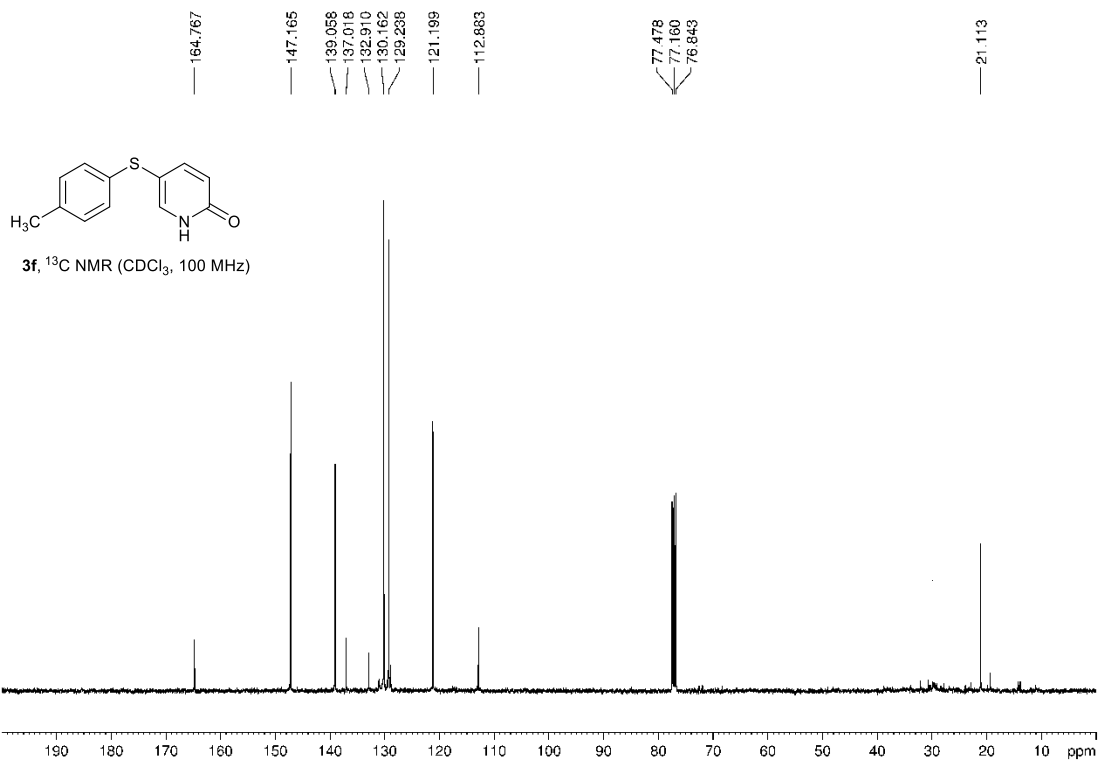

### Ethyl 2-(2-oxo-5-(*p*-tolylthio)pyridin-1(2*H*)-yl)acetate (**3g**)

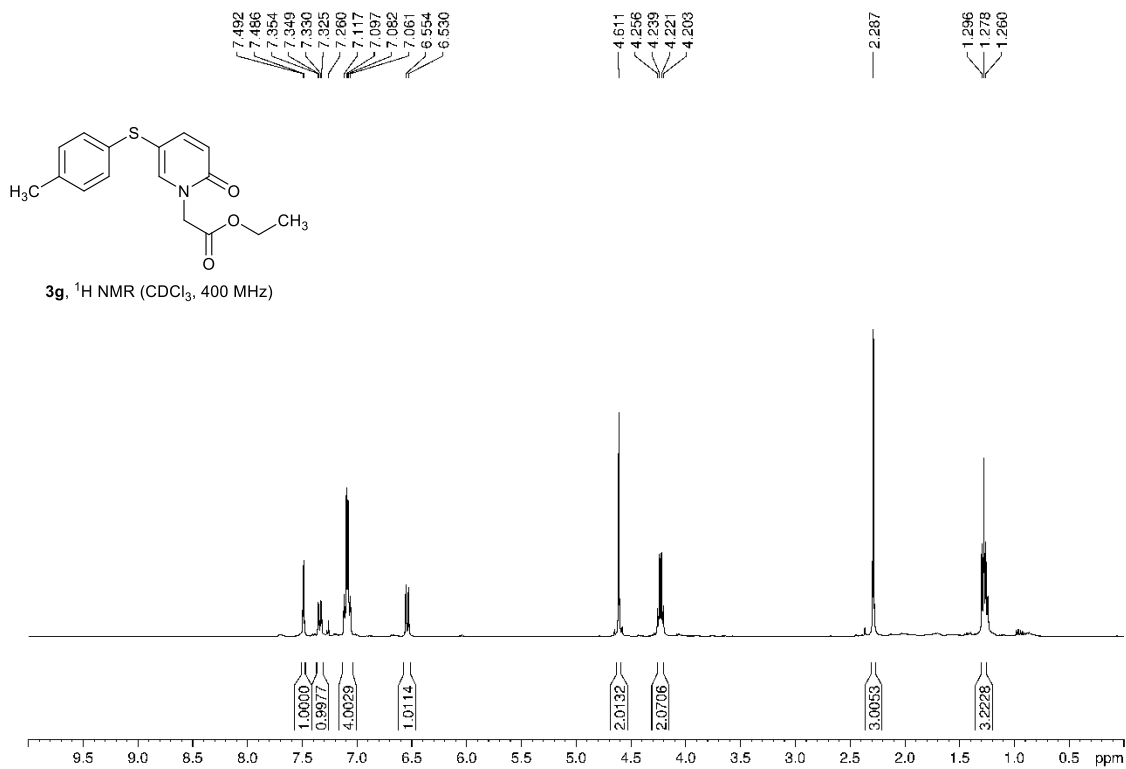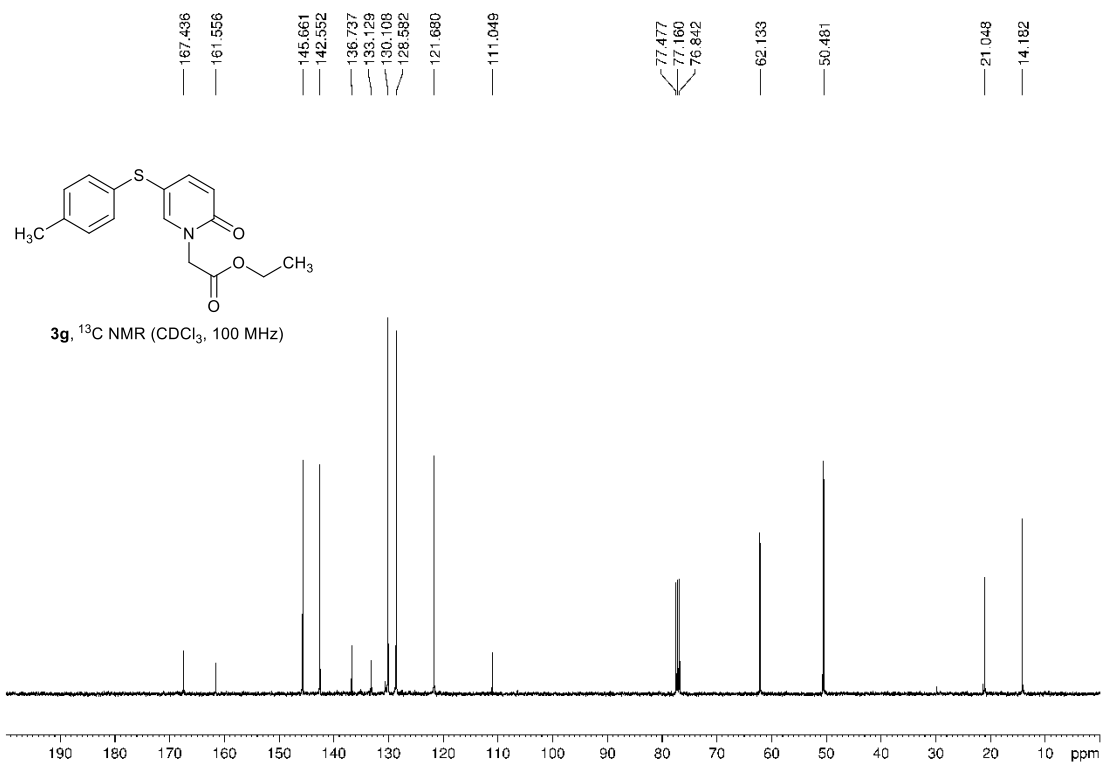

### 1-Phenyl-5-(*p*-tolylthio)pyridin-2(1*H*)-one (3h)

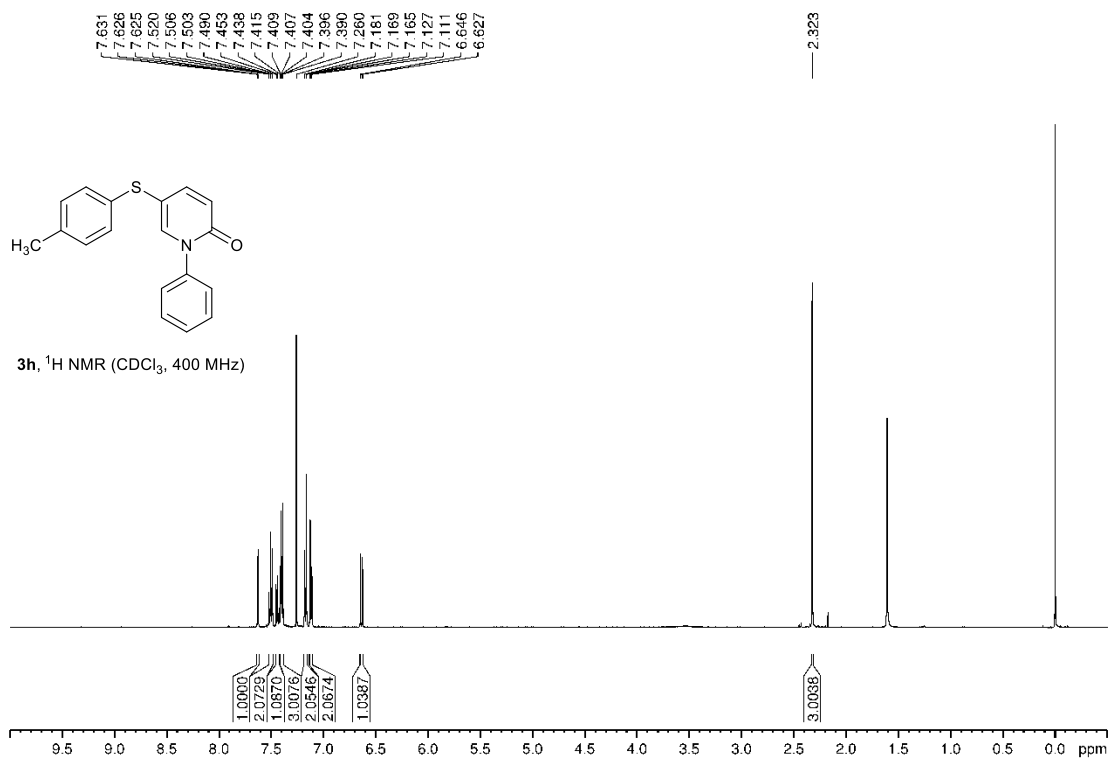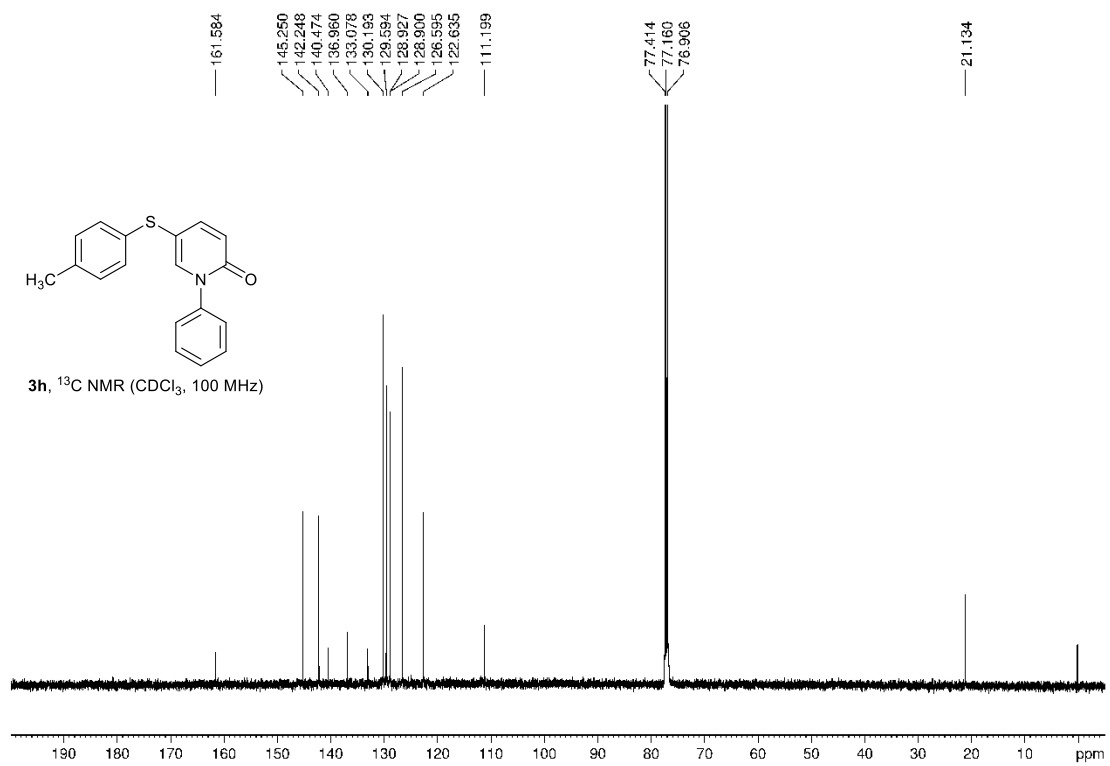

**5-(*p*-Tolylthio)-2*H*-[1,2'-bipyridin]-2-one (3i)**

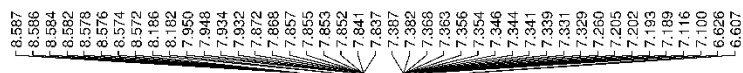

2.315

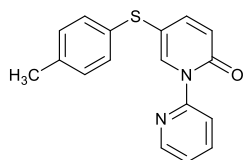

3i, <sup>1</sup>H NMR (CDCl<sub>3</sub>, 400 MHz)

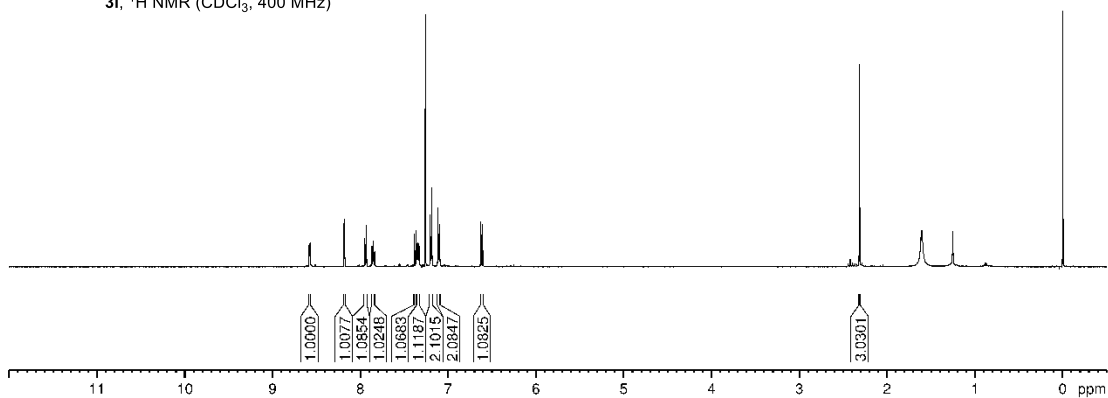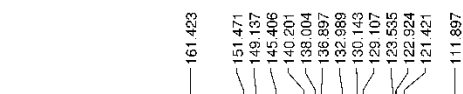

77.413, 77.160, 76.907

21.118

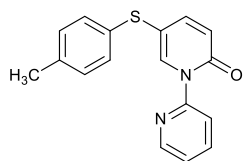

3i, <sup>13</sup>C NMR (CDCl<sub>3</sub>, 100 MHz)

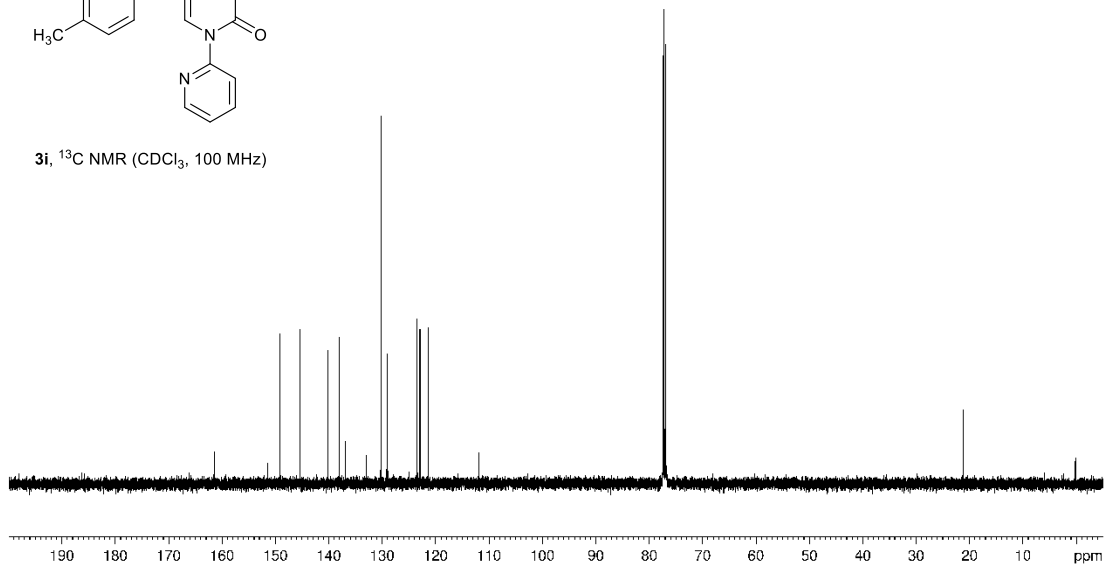

### 1-Ethyl-3-methyl-5-(*p*-tolylthio)pyridin-2(1*H*)-one (3j)

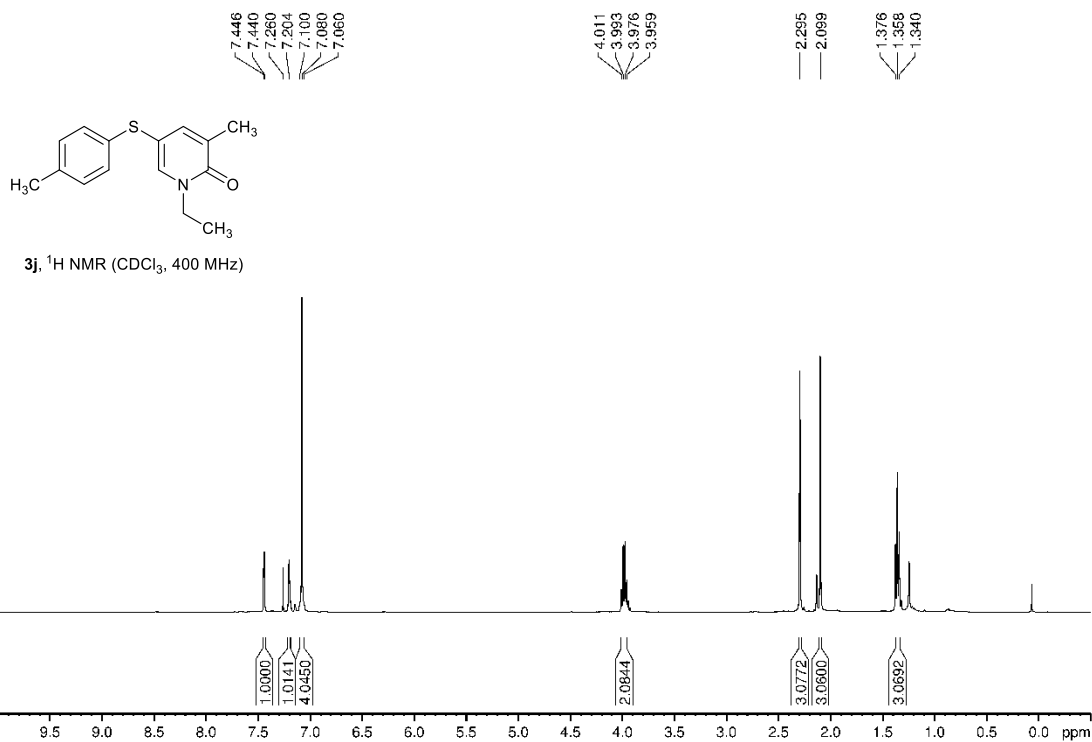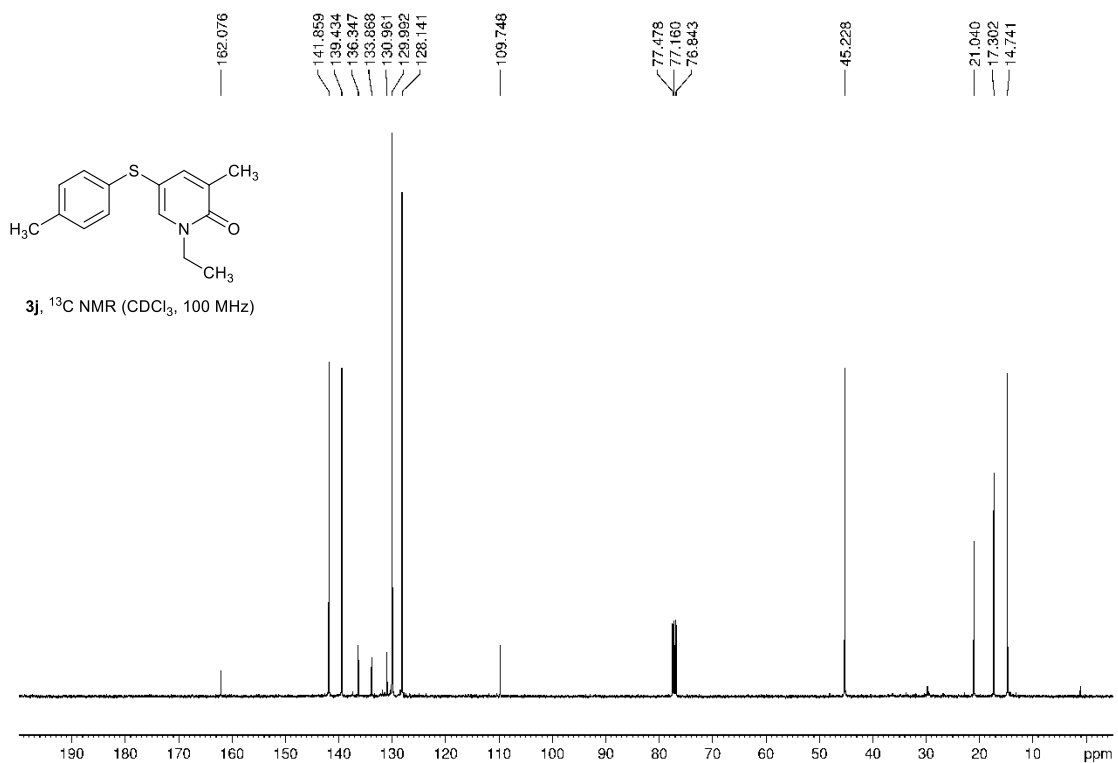

### 3-Methyl-5-(*p*-tolylthio)pyridin-2(1*H*)-one (3k)

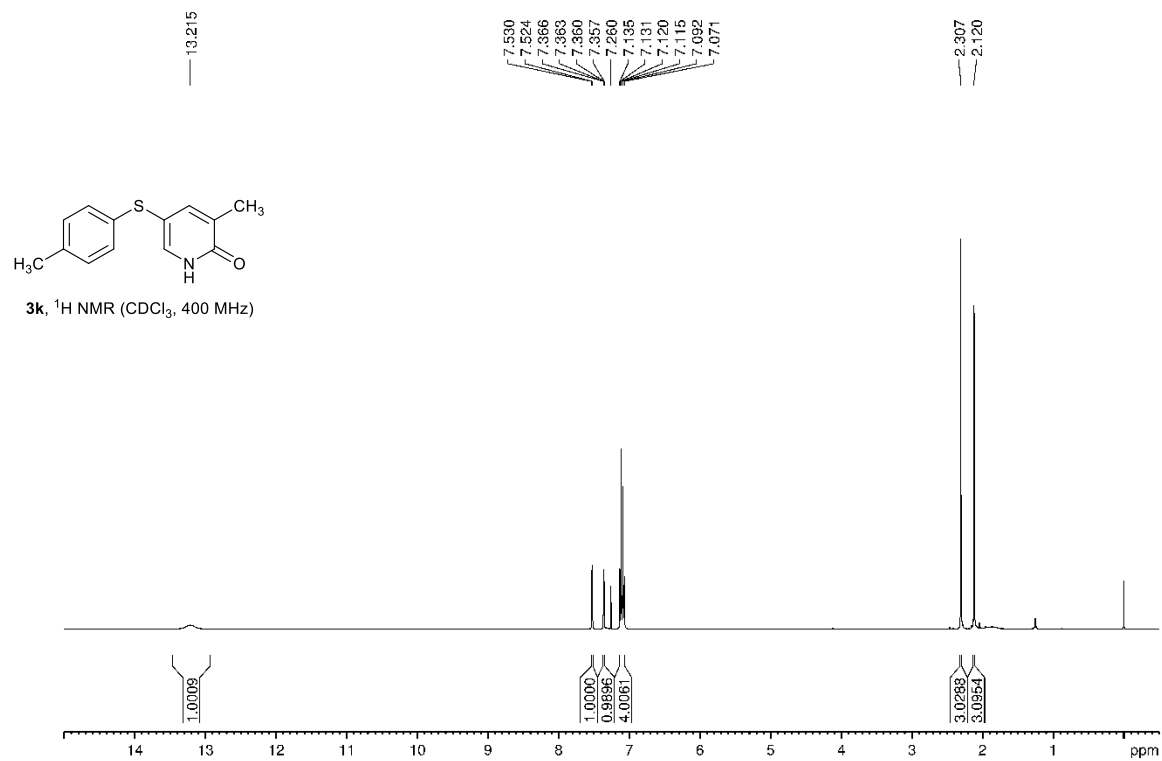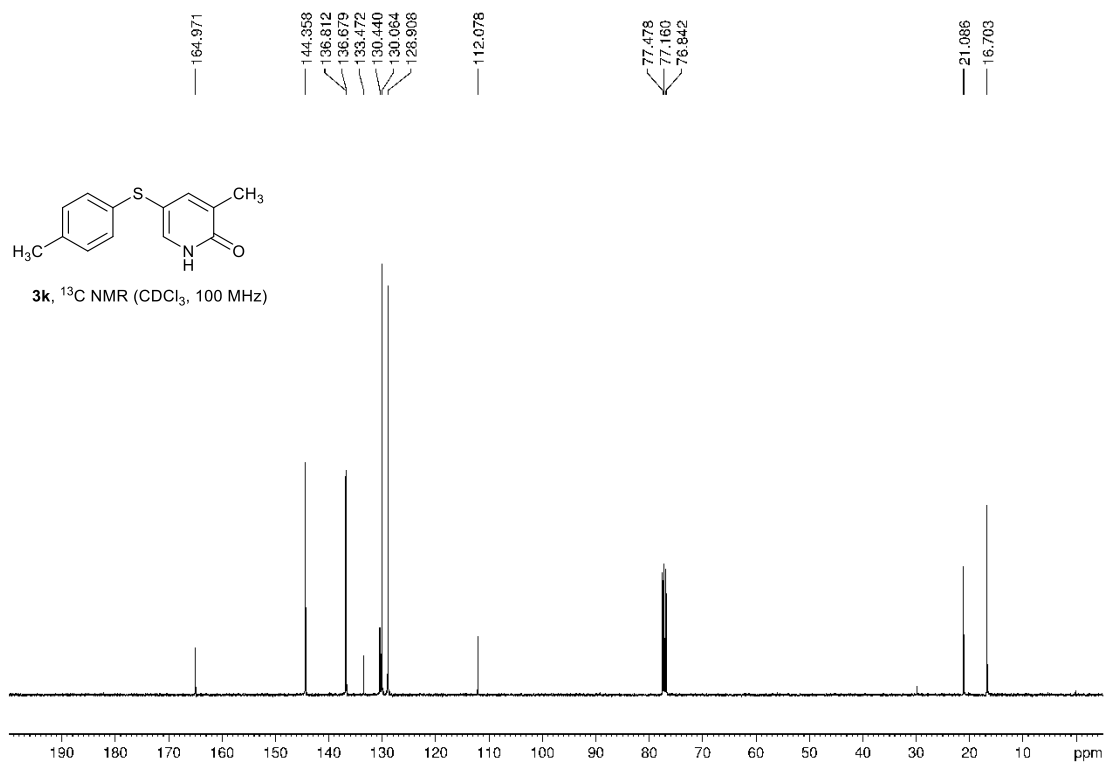

### 3-Chloro-1-ethyl-5-(*p*-tolylthio)pyridin-2(1*H*)-one (3I)

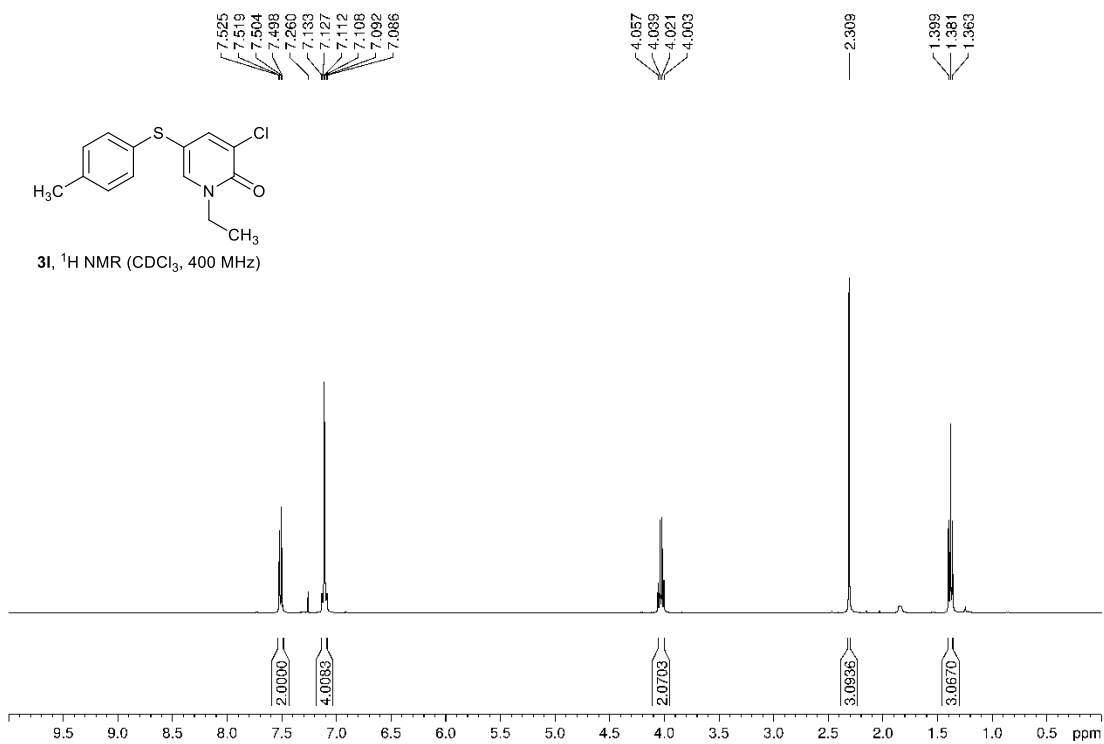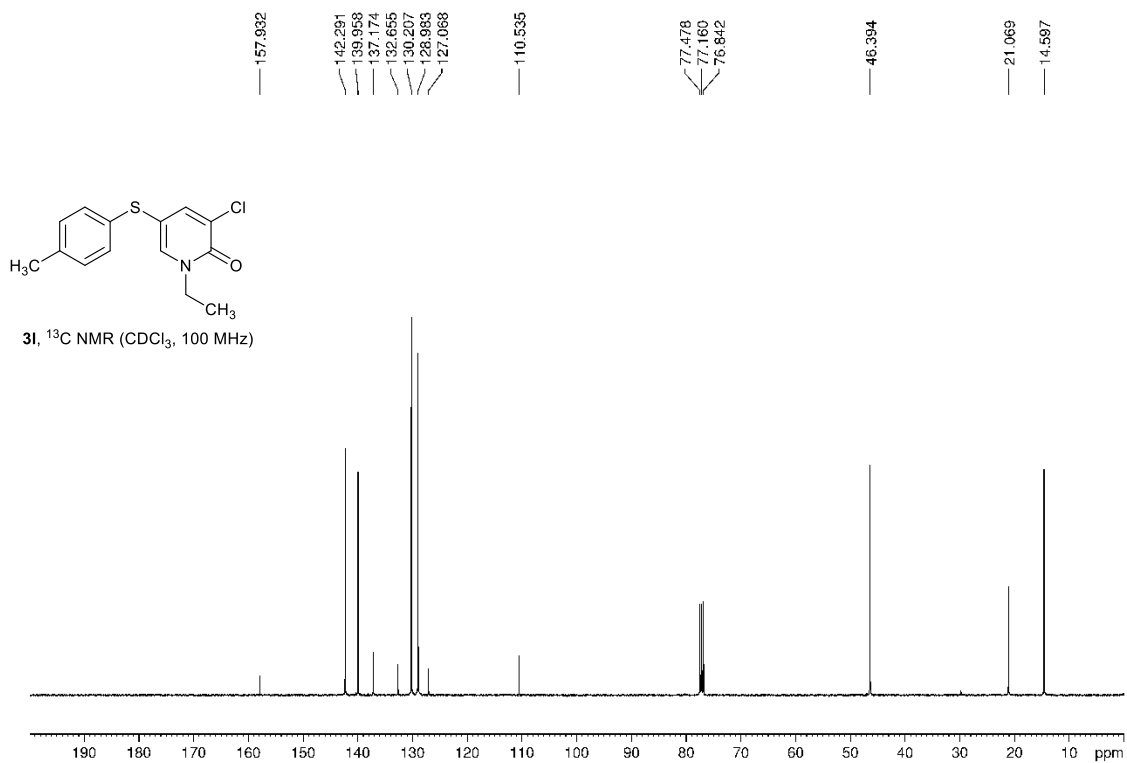

### 3-Chloro-5-(*p*-tolylthio)pyridin-2(1*H*)-one (3m)

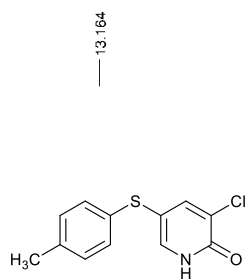

3m, <sup>1</sup>H NMR (CDCl<sub>3</sub>, 400 MHz)

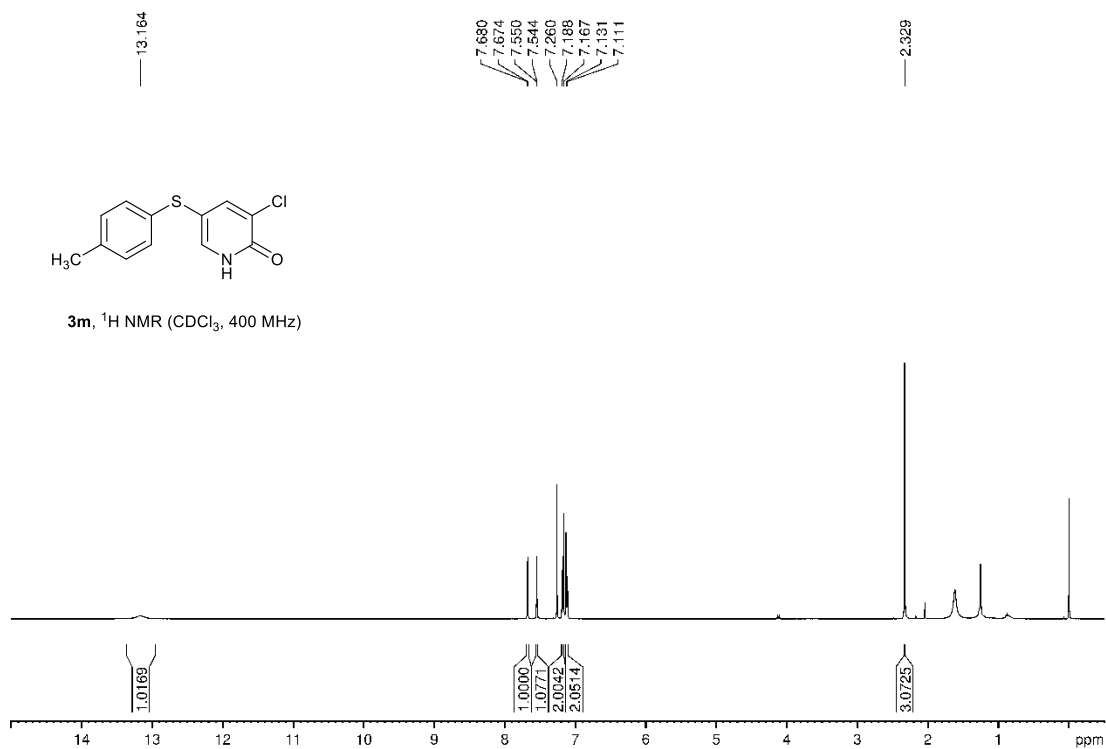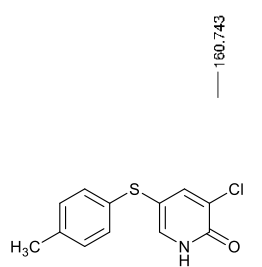

3m, <sup>13</sup>C NMR (CDCl<sub>3</sub>, 100 MHz)

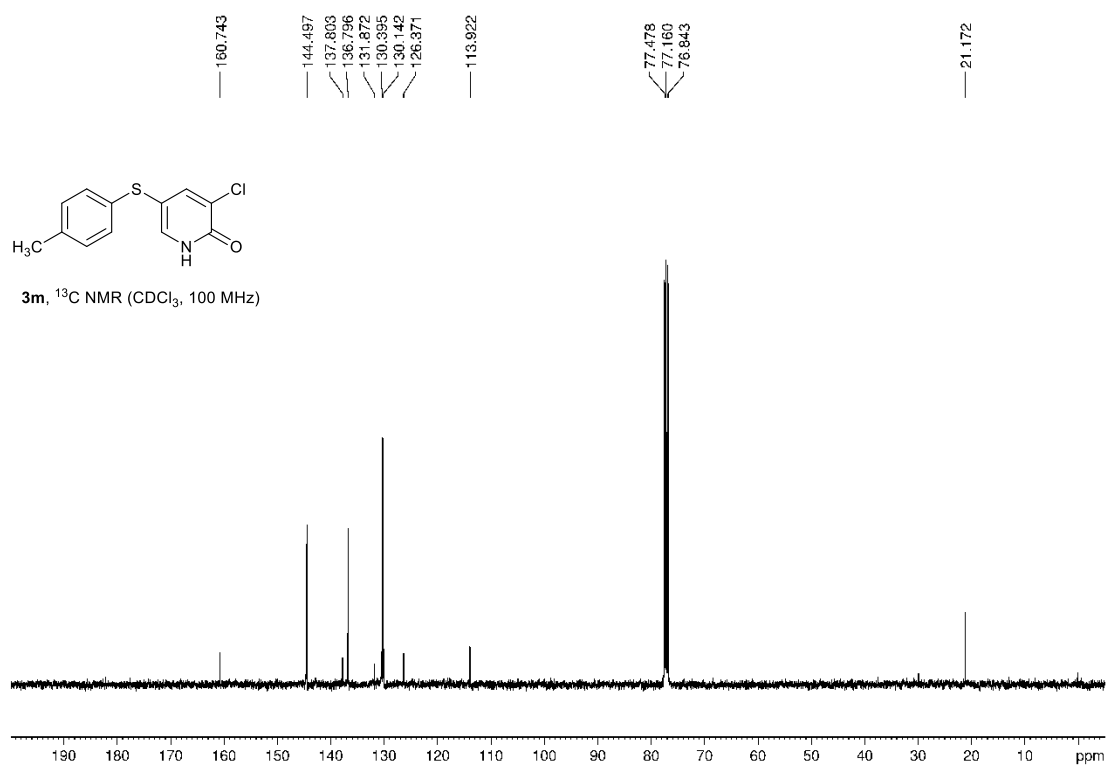



### 1-Ethyl-3-nitro-5-(*p*-tolylthio)pyridin-2(1*H*)-one (3n)

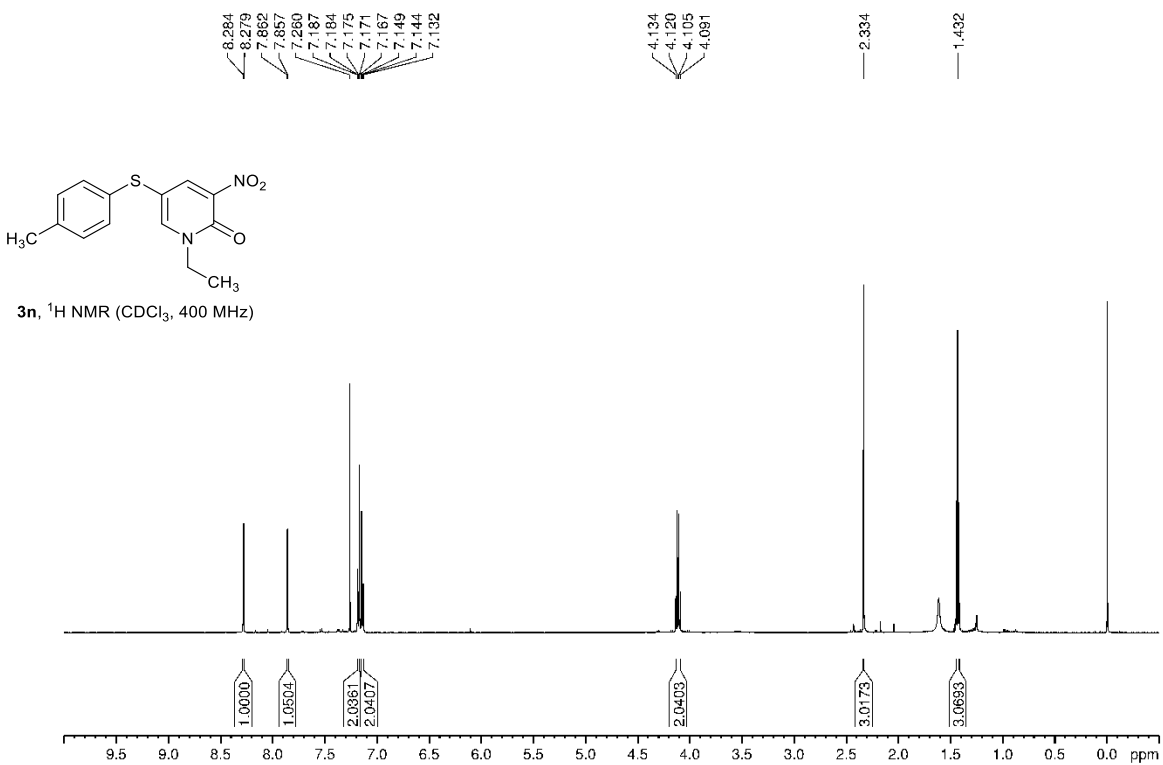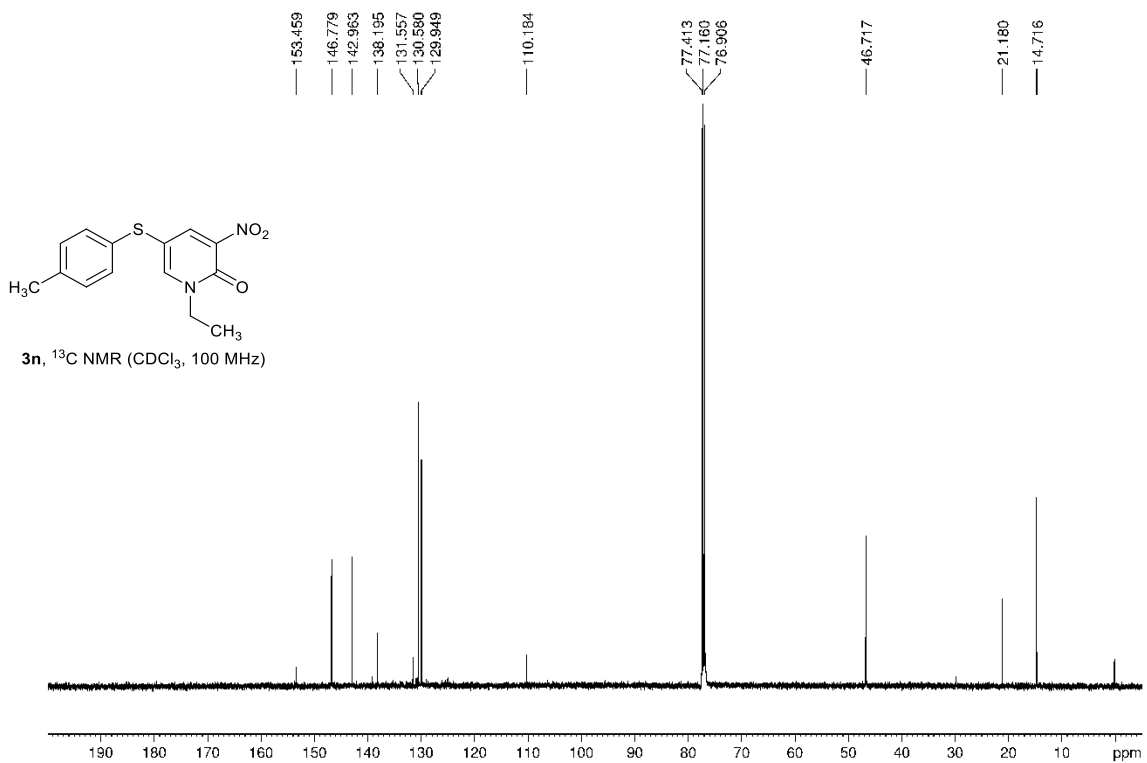

### 3-nitro-5-(*p*-tolylthio)pyridin-2(1*H*)-one (3o)

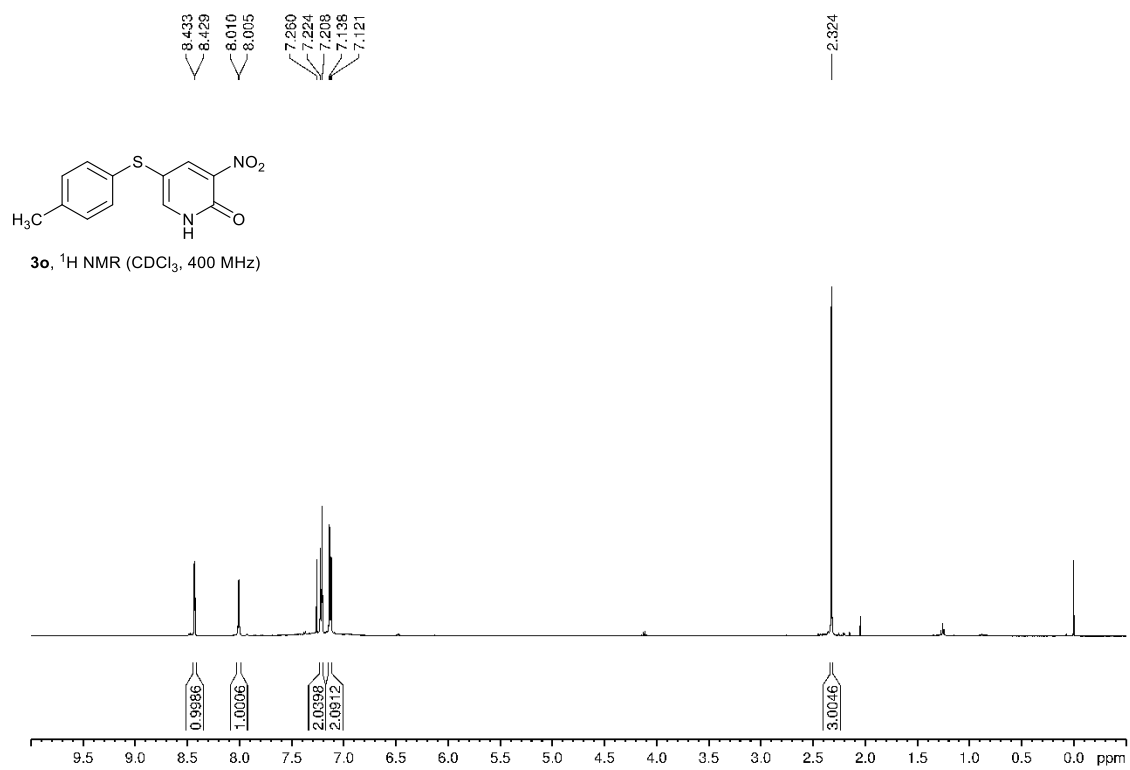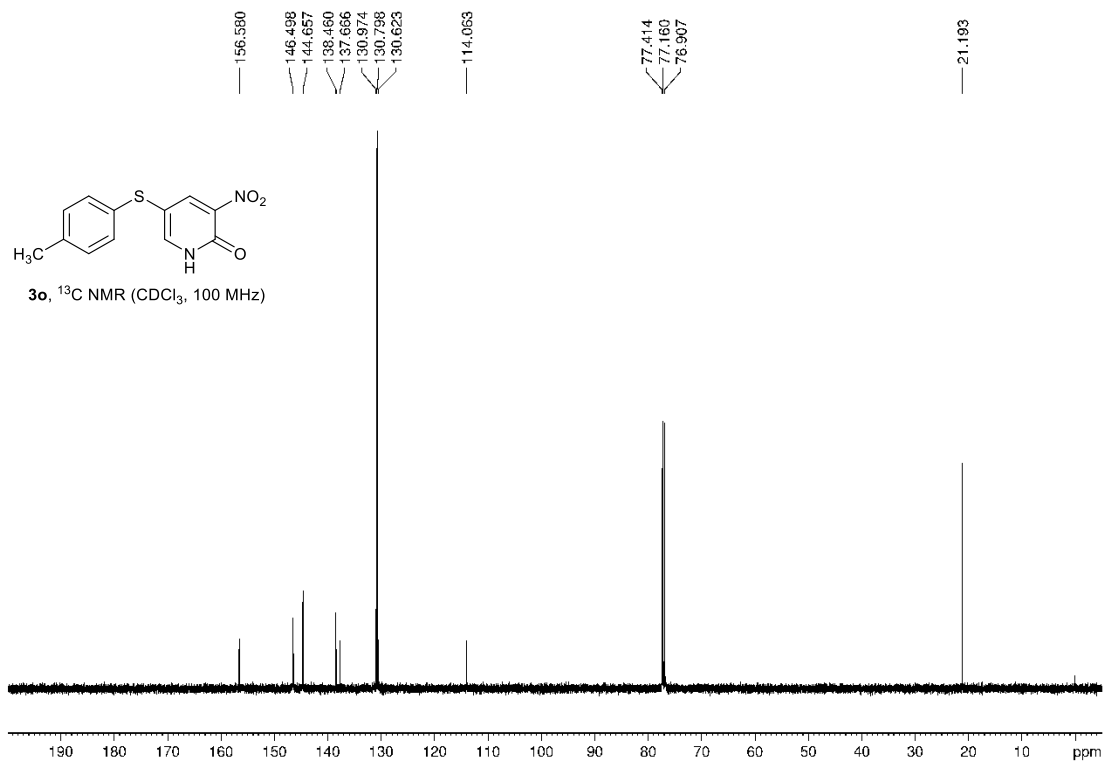

# 1-Ethyl-4-methoxy-2-oxo-5-(*p*-tolylthio)-1,2-dihydropyridine-3-carbonitrile (3p)

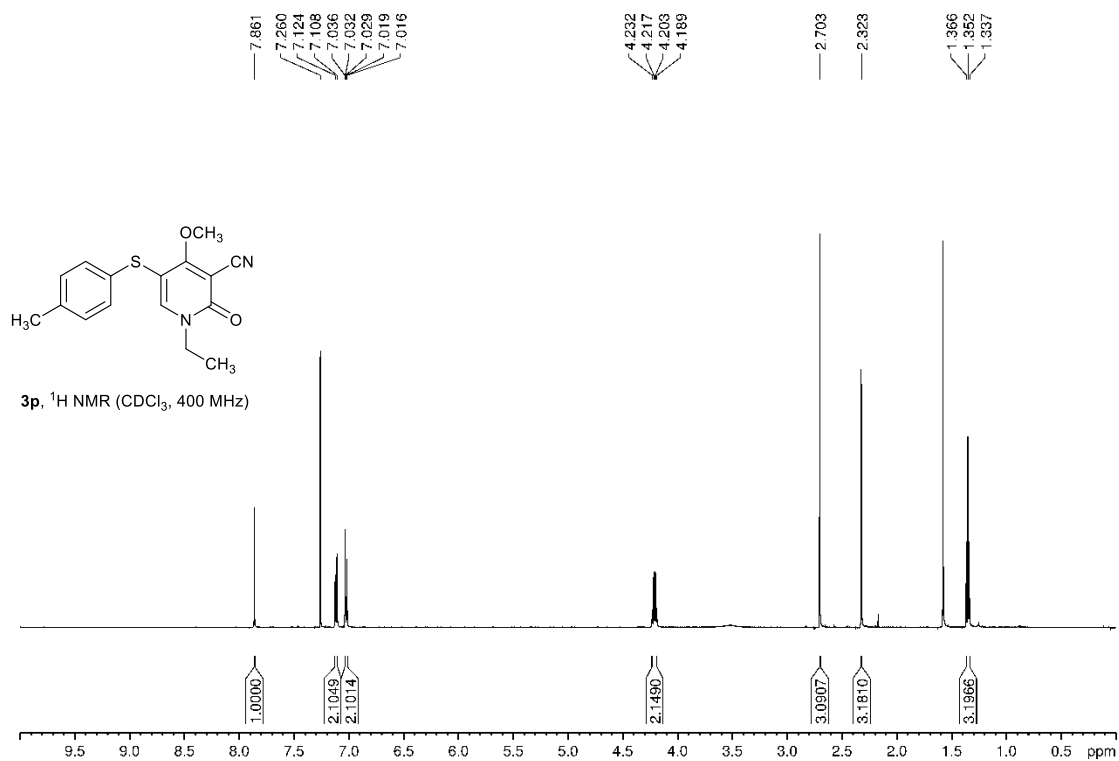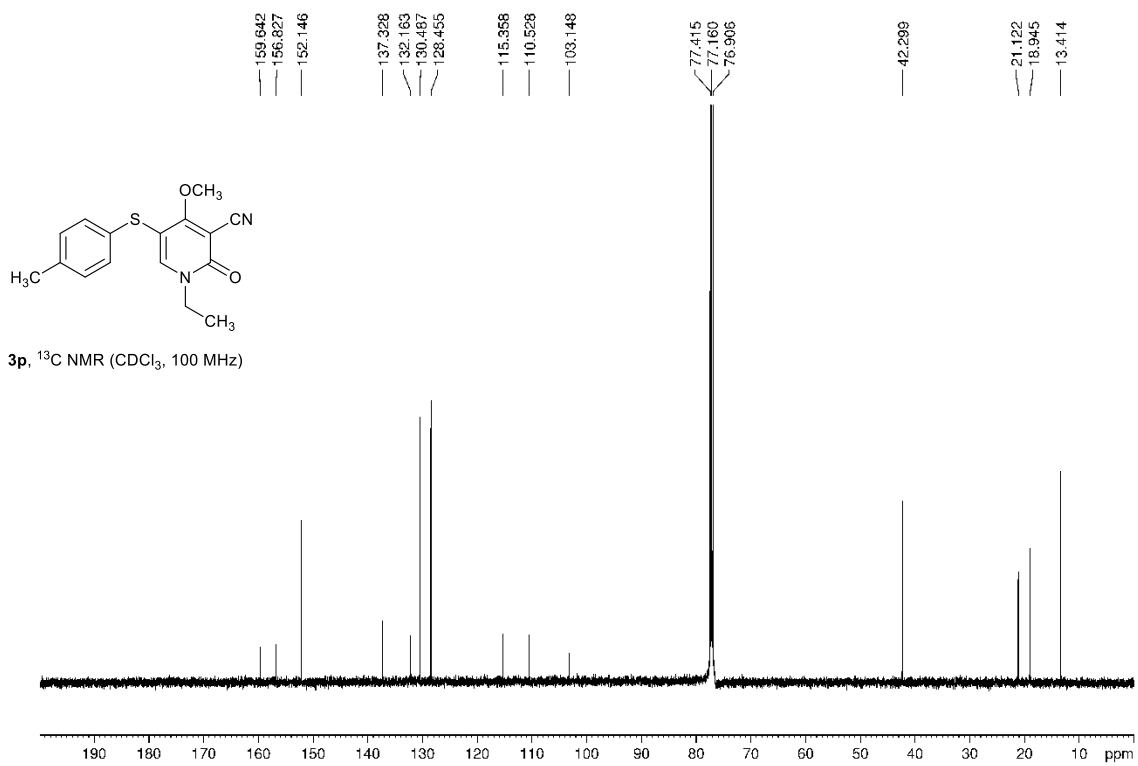

### 4-(*p*-Tolylthio)isoquinolin-1(2*H*)-one (3s)

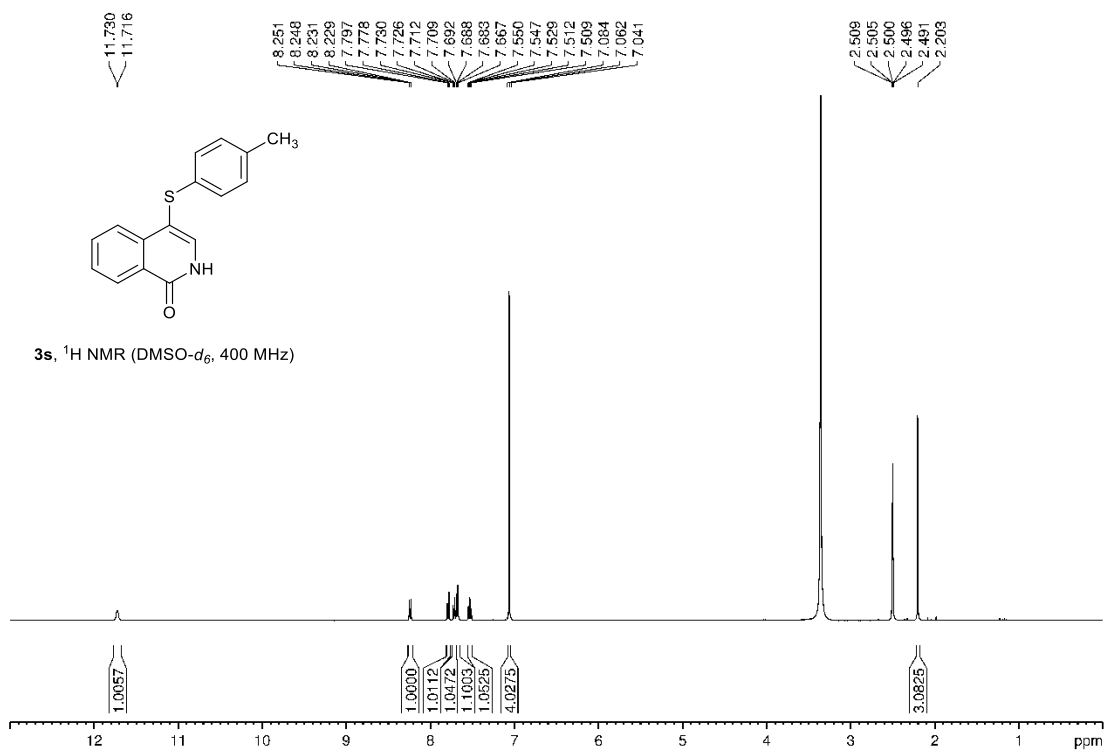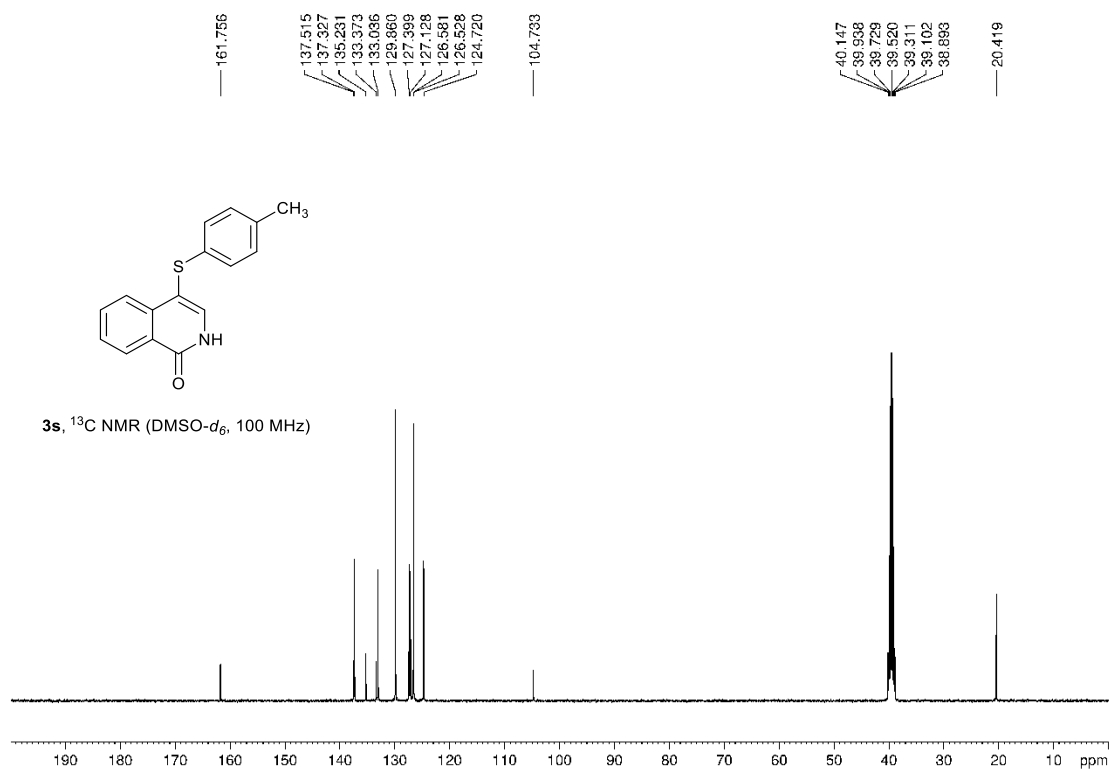

# 1-Ethyl-3-methyl-5-(phenylthio)pyridin-2(1H)-one (4a)

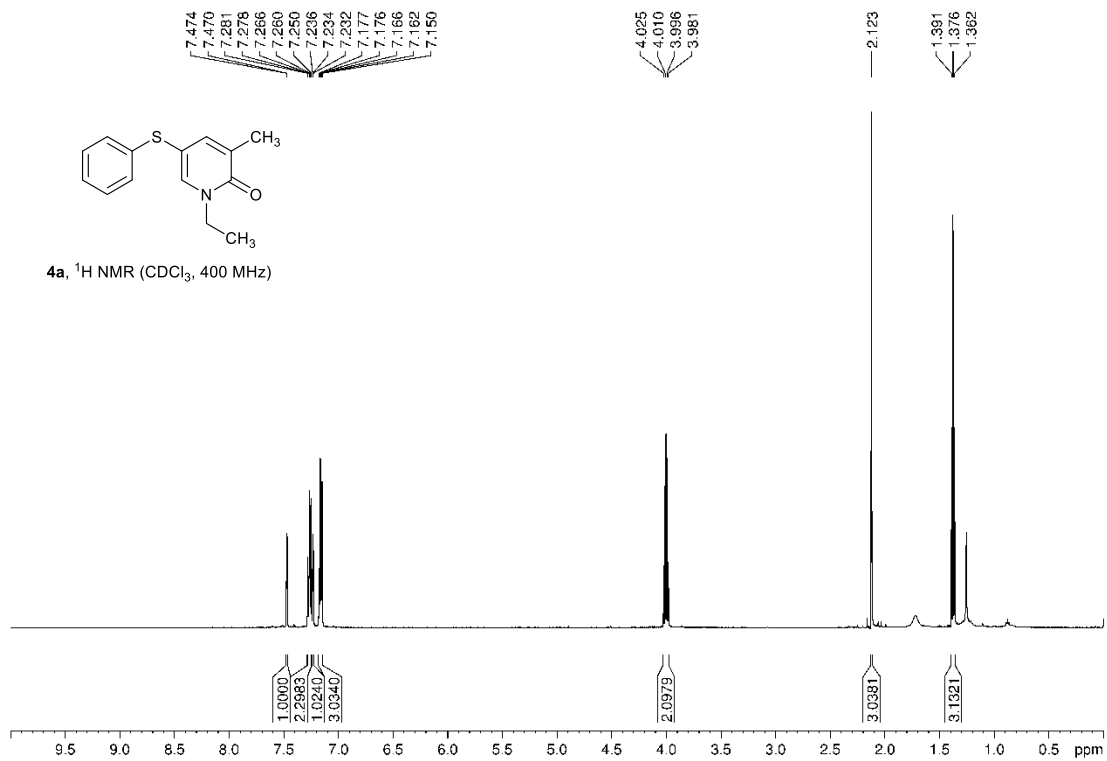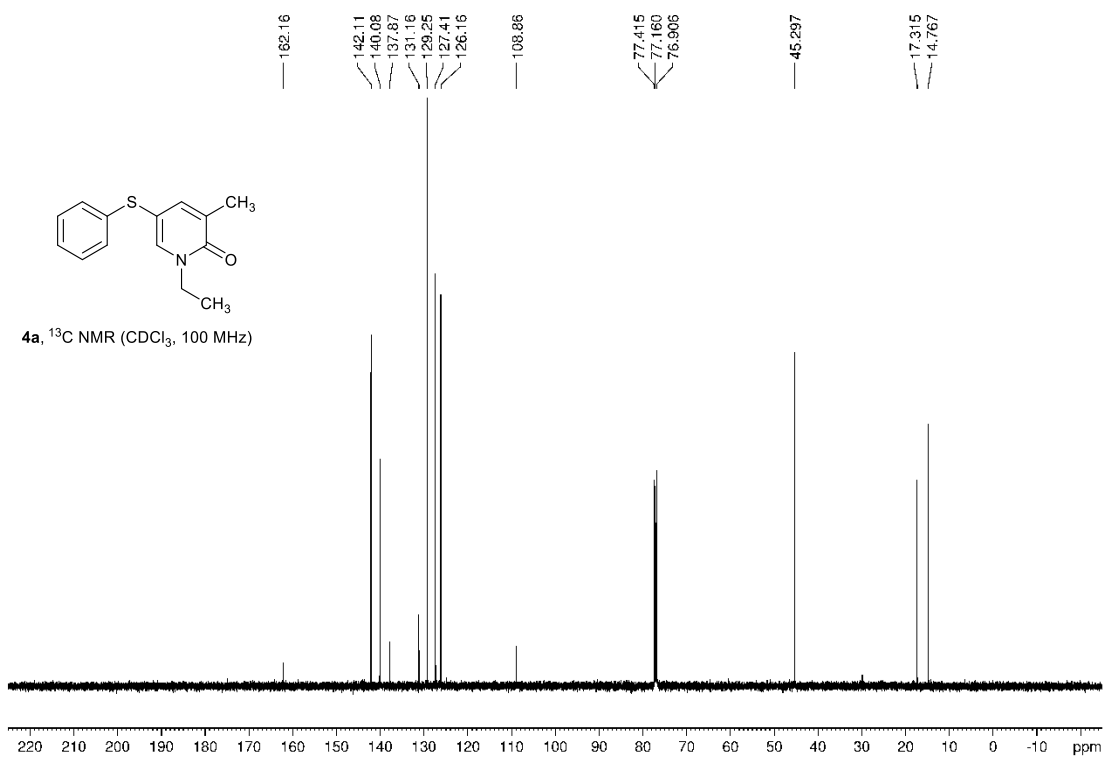

# 1-Ethyl-5-((4-methoxyphenyl)thio)-3-methylpyridin-2(1H)-one (4b)

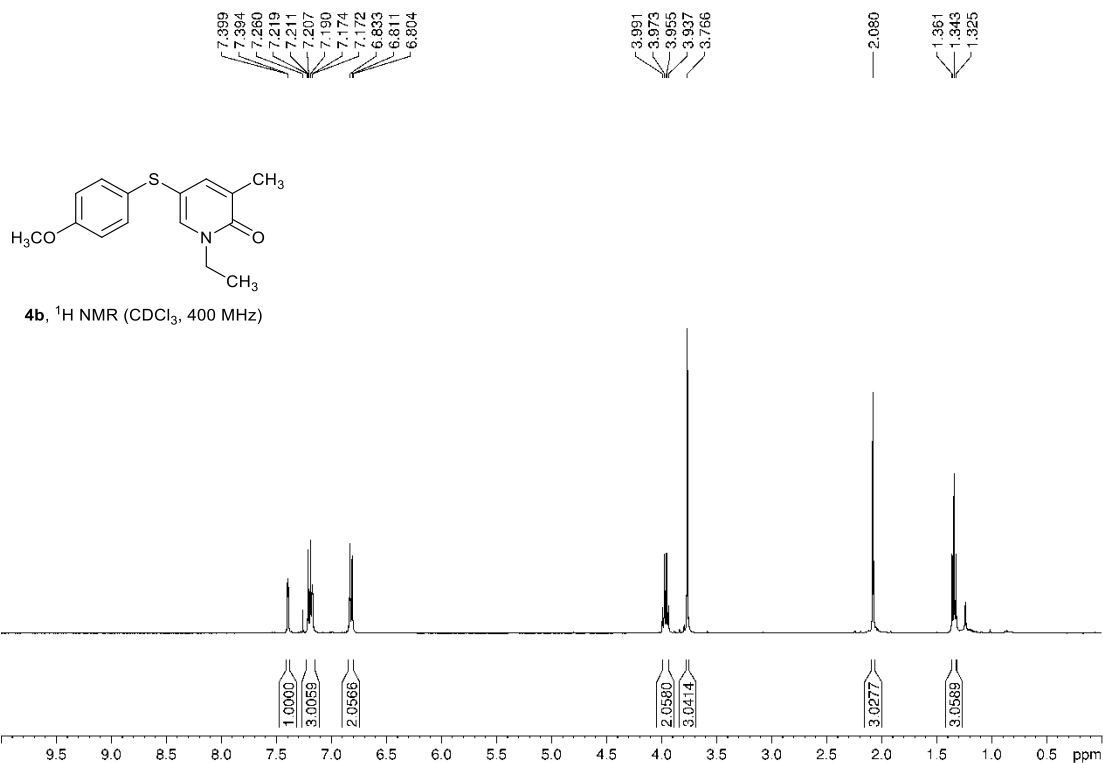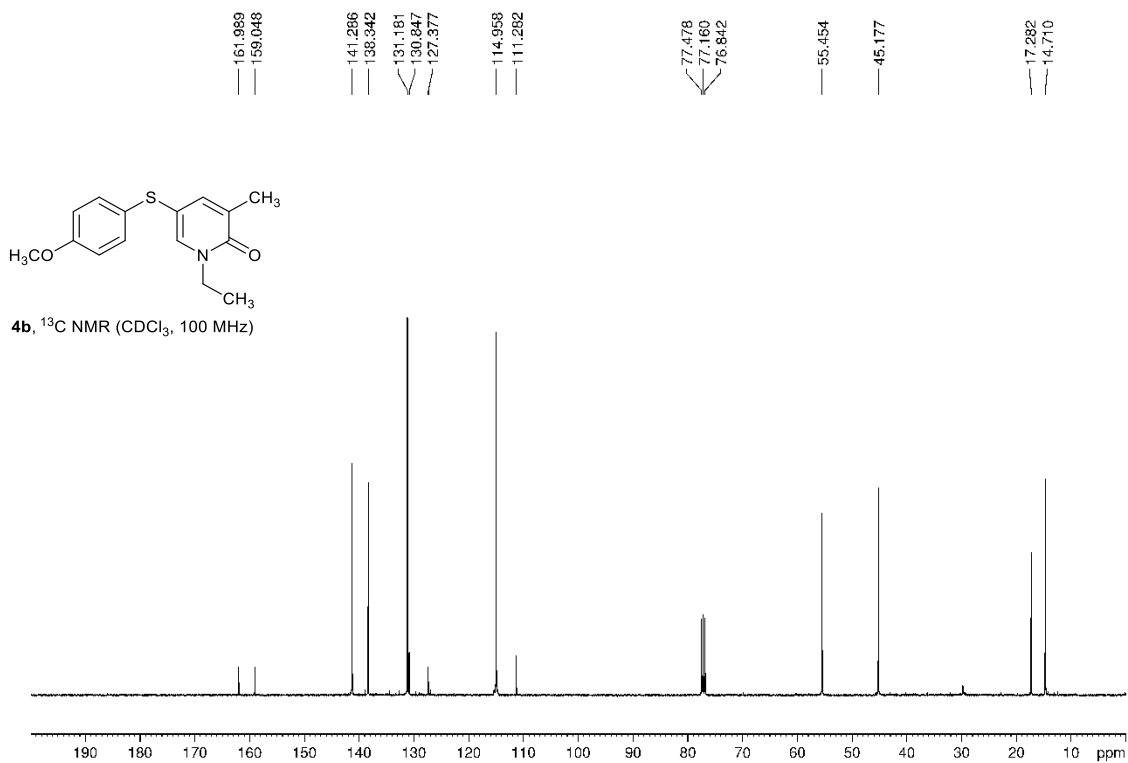

# 1-Ethyl-5-((4-hydroxyphenyl)thio)-3-methylpyridin-2(1H)-one (4c)

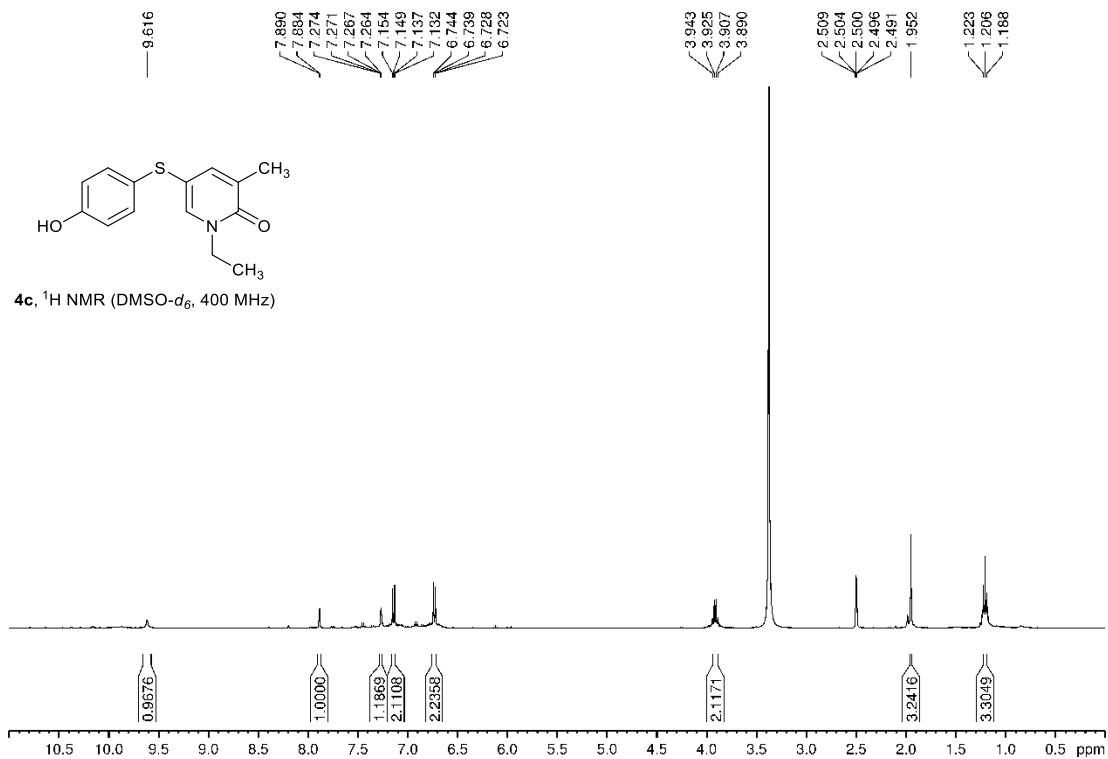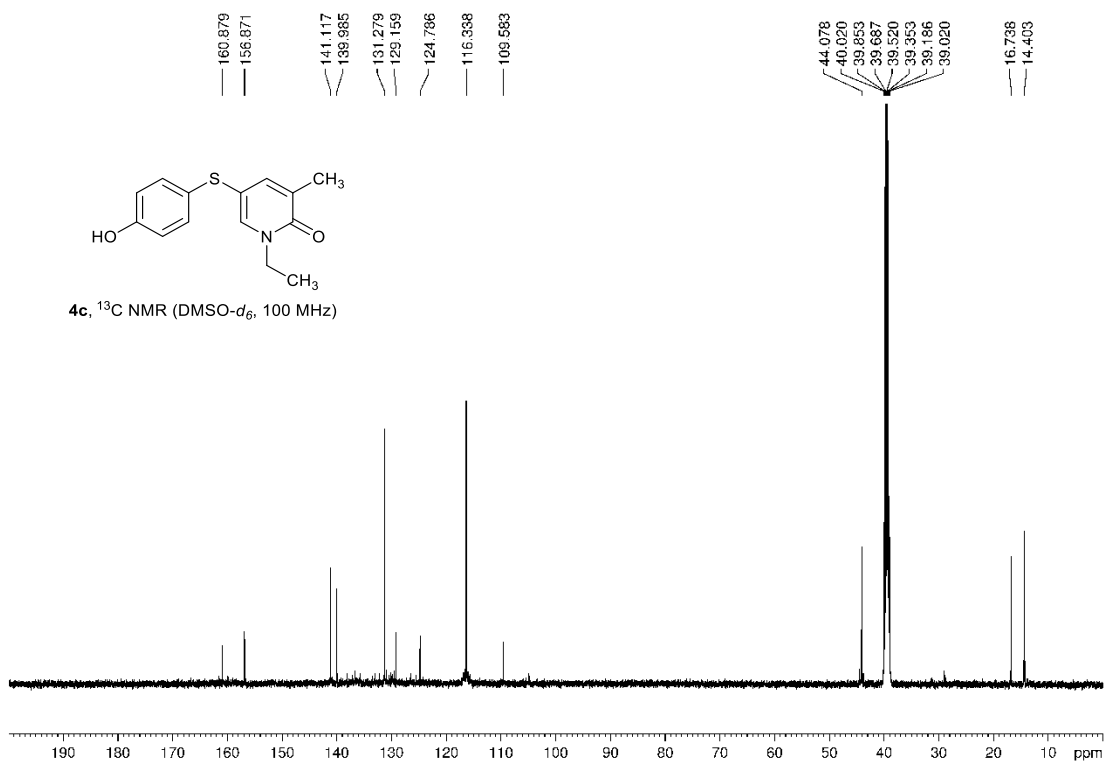

### 5-((4-Chlorophenyl)thio)-1-ethyl-3-methylpyridin-2(1H)-one (4f)

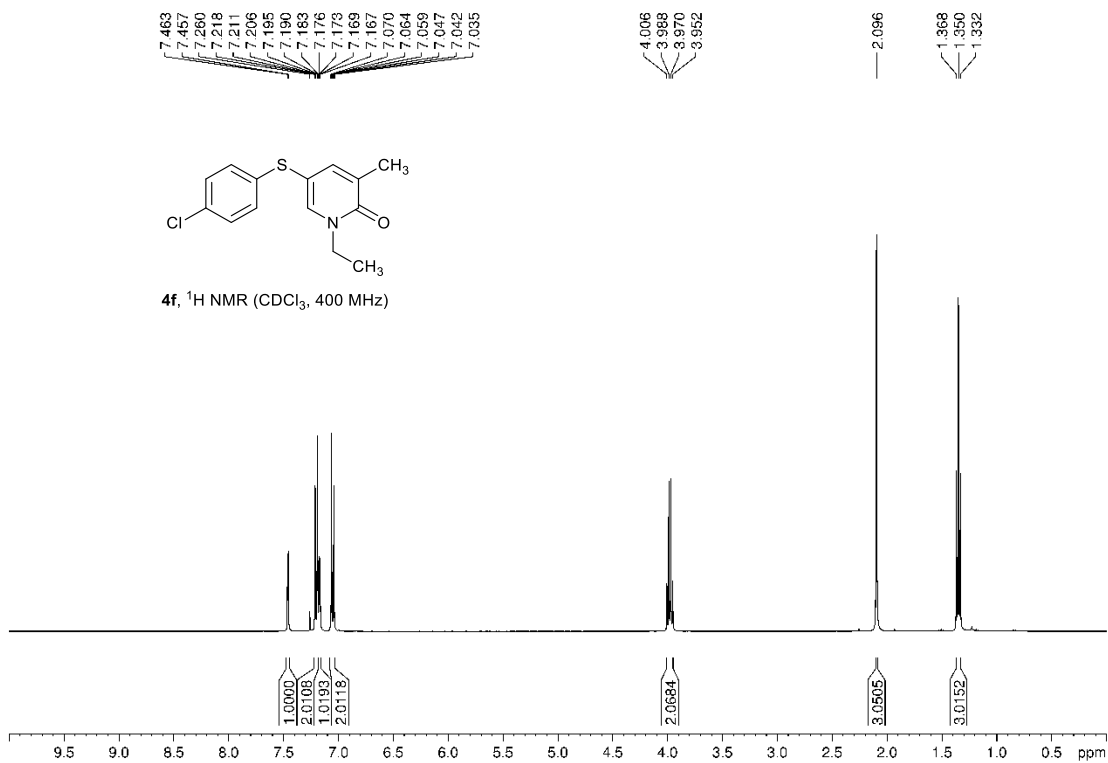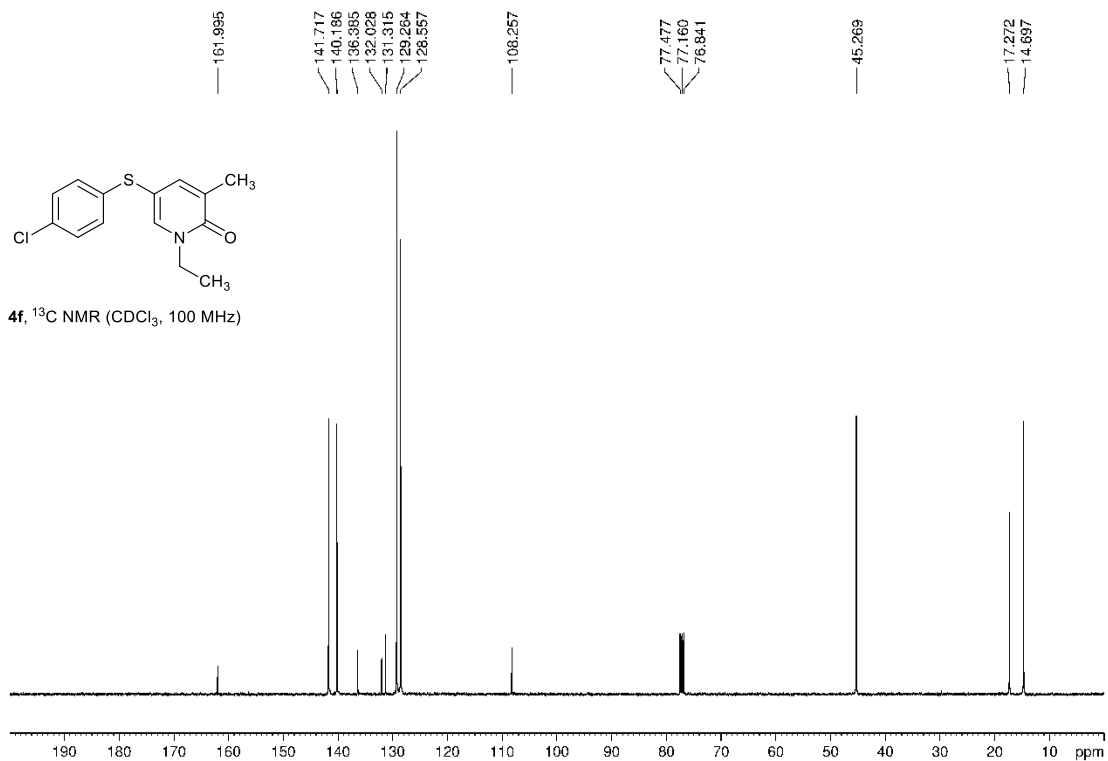



# 1-Ethyl-3-methyl-5-((2,4,5-trichlorophenyl)thio)pyridin-2(1H)-one (4g)

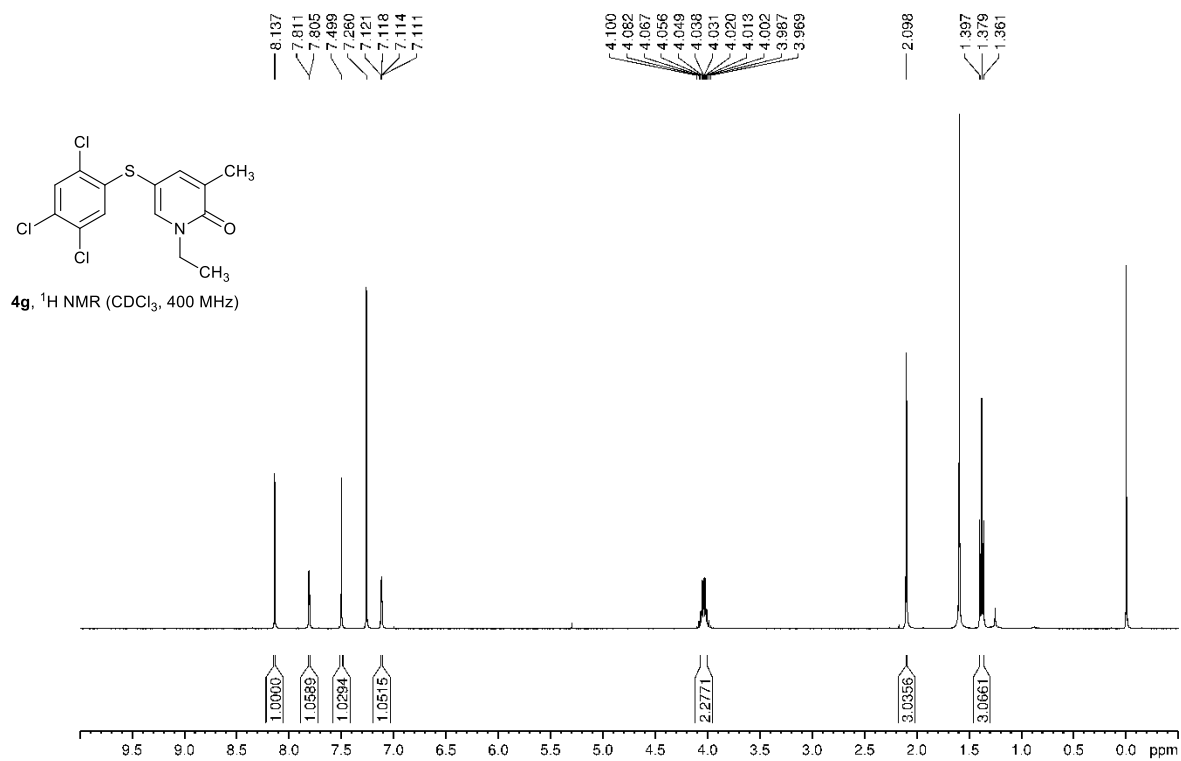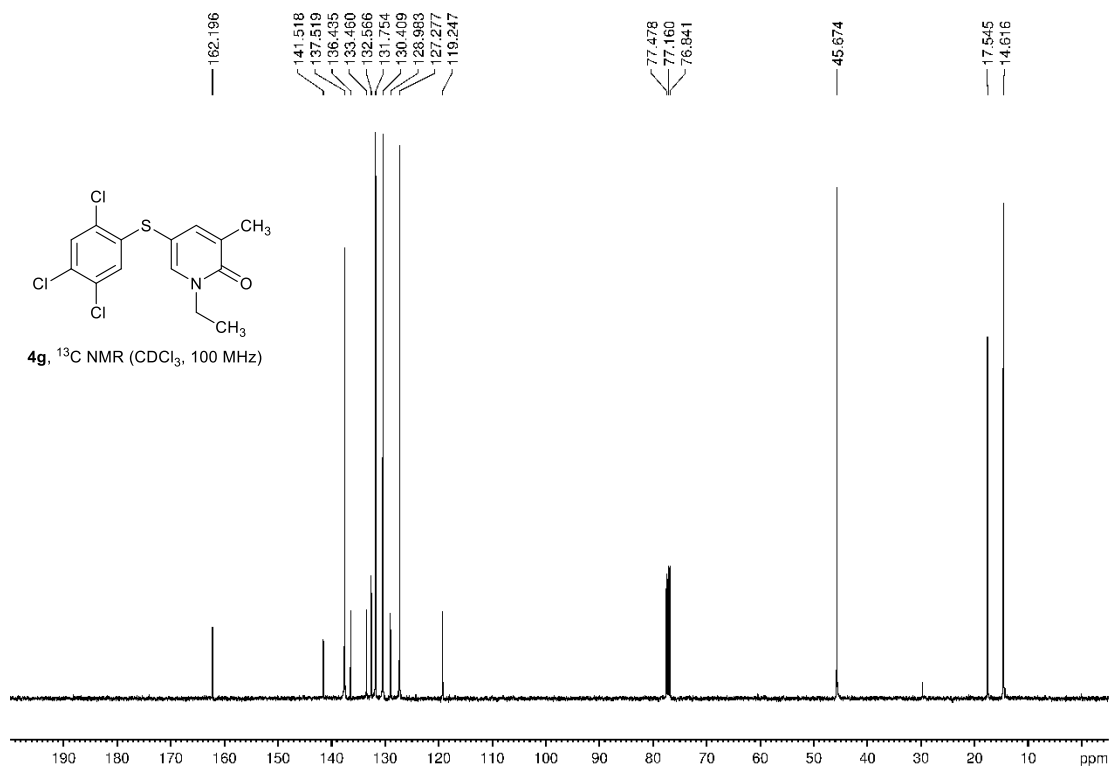

***N*-2-((1-Ethyl-5-methyl-6-oxo-1,6-dihydropyridin-3-yl)thio)phenyl)benzamide (4h)**

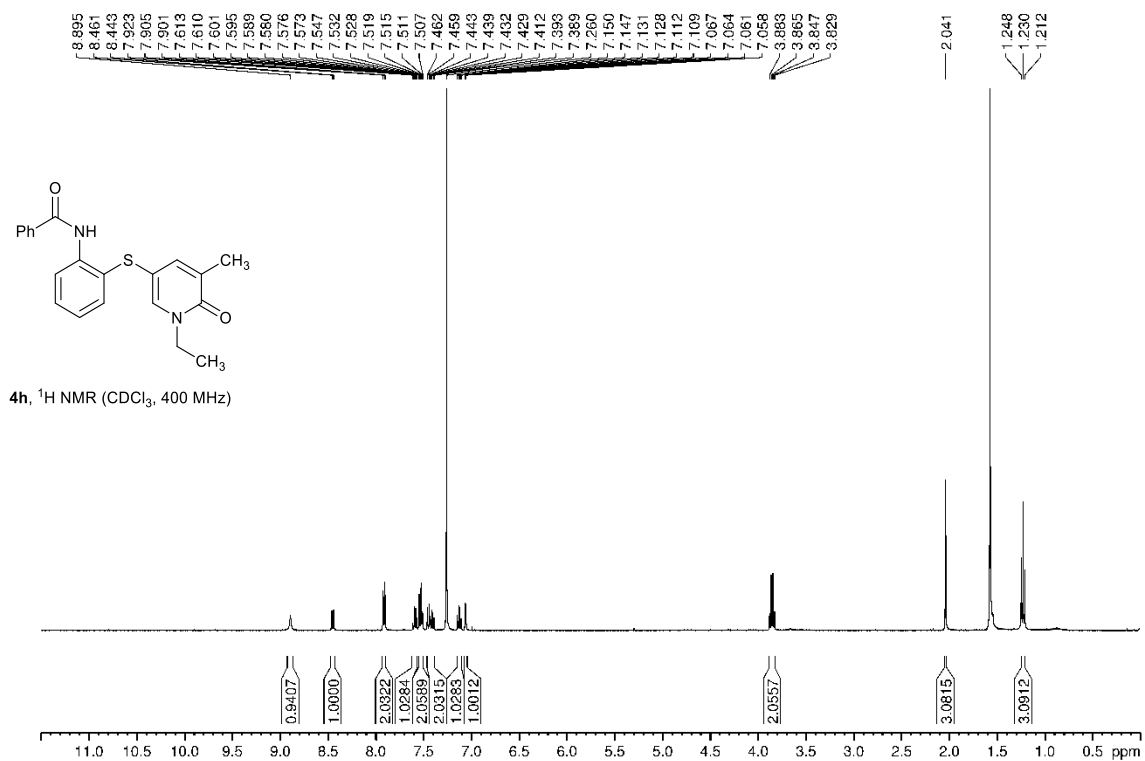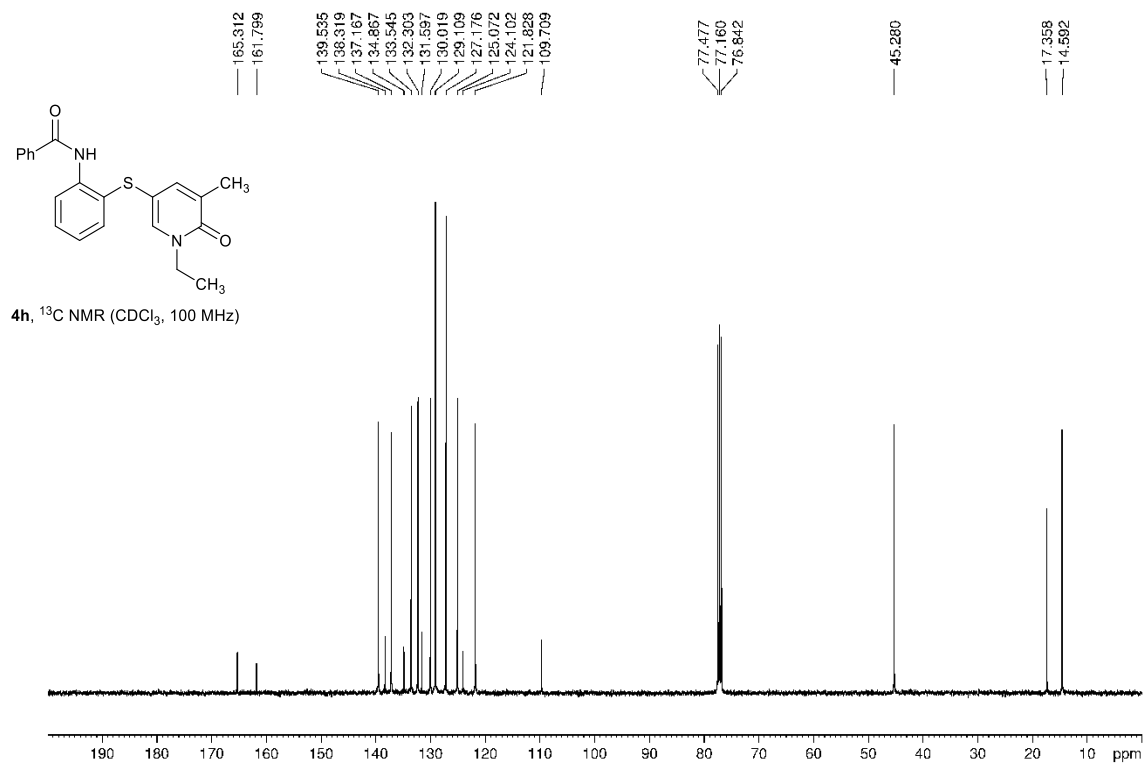

### 5-(Benzo[d]thiazol-2-ylthio)-1-ethyl-3-methylpyridin-2(1H)-one (4i)

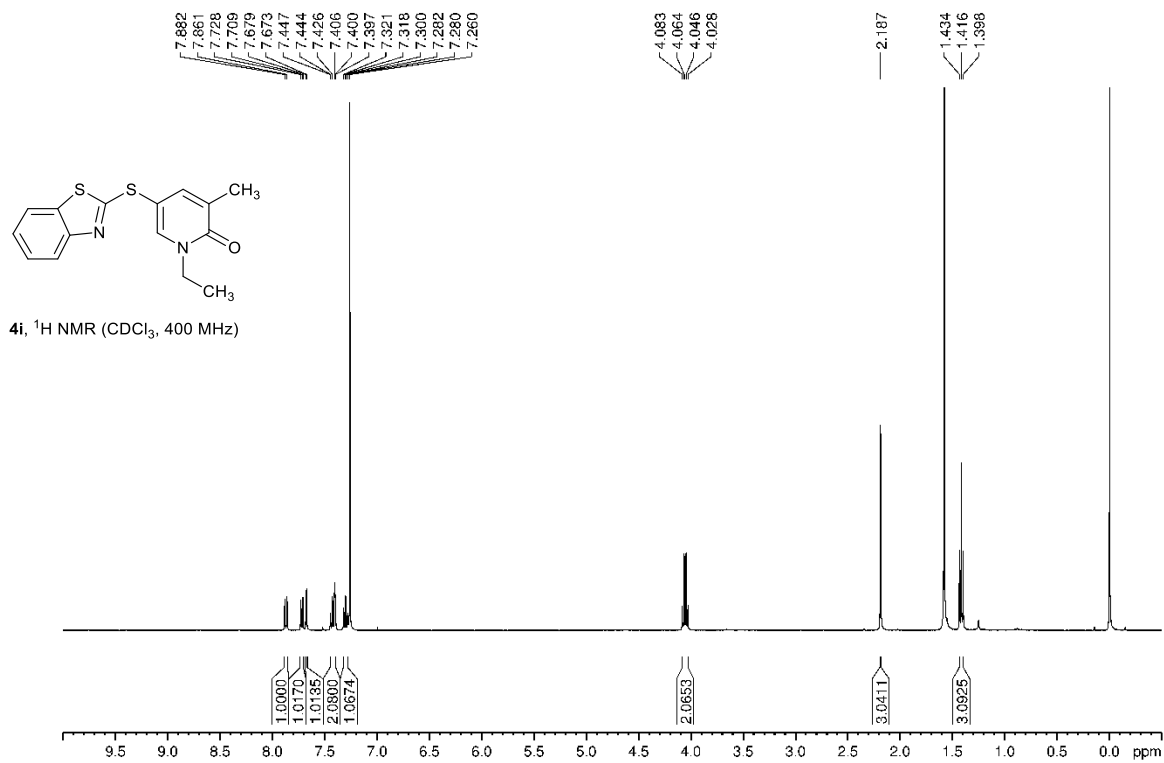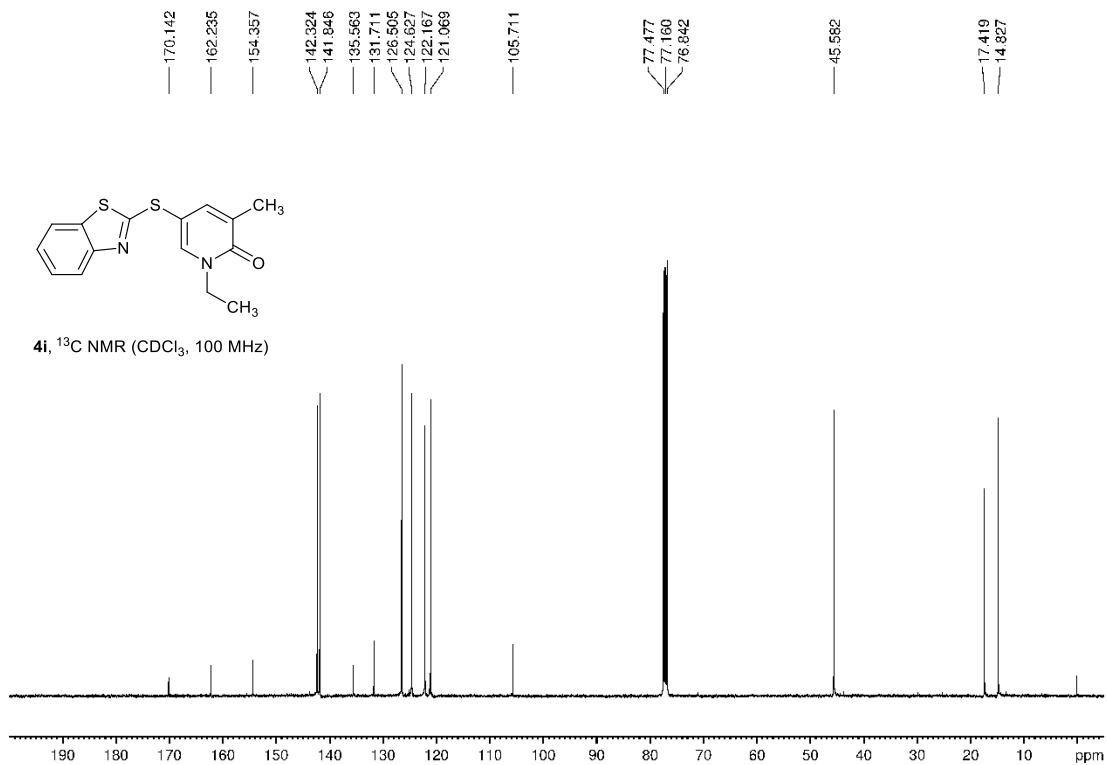

### 1-Ethyl-3-methyl-5-(thiophen-2-ylthio)pyridin-2(1H)-one (4j)

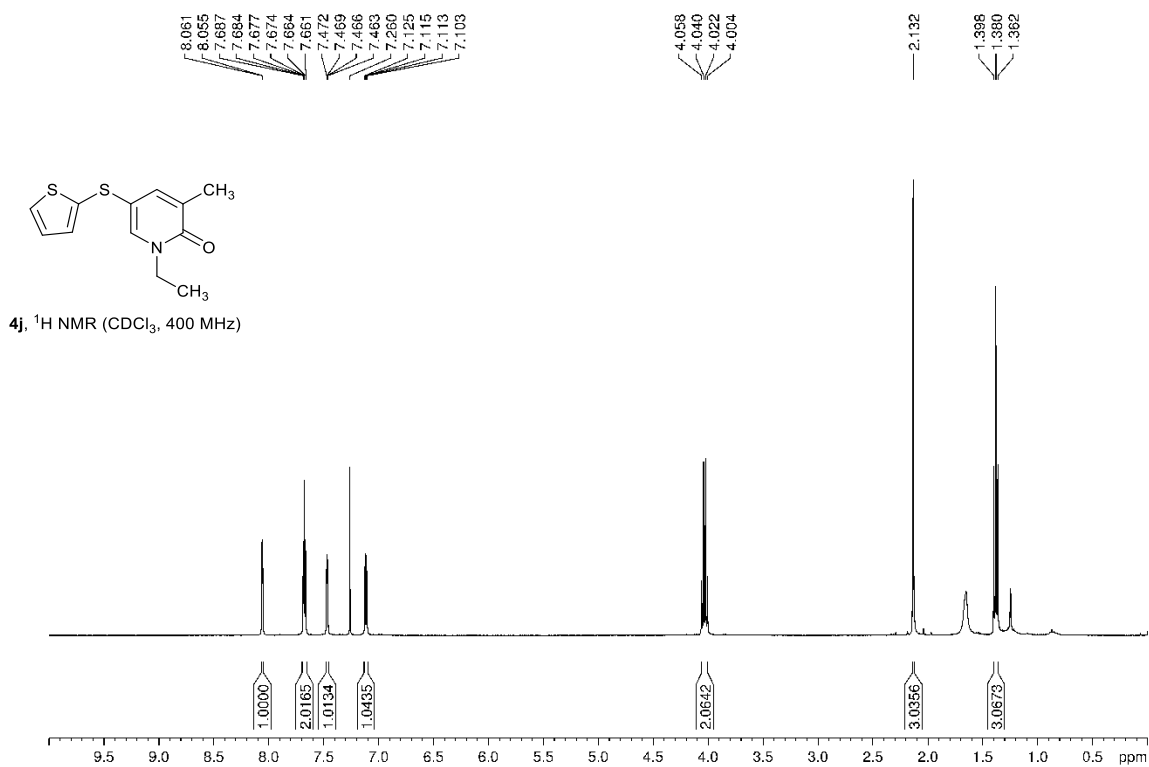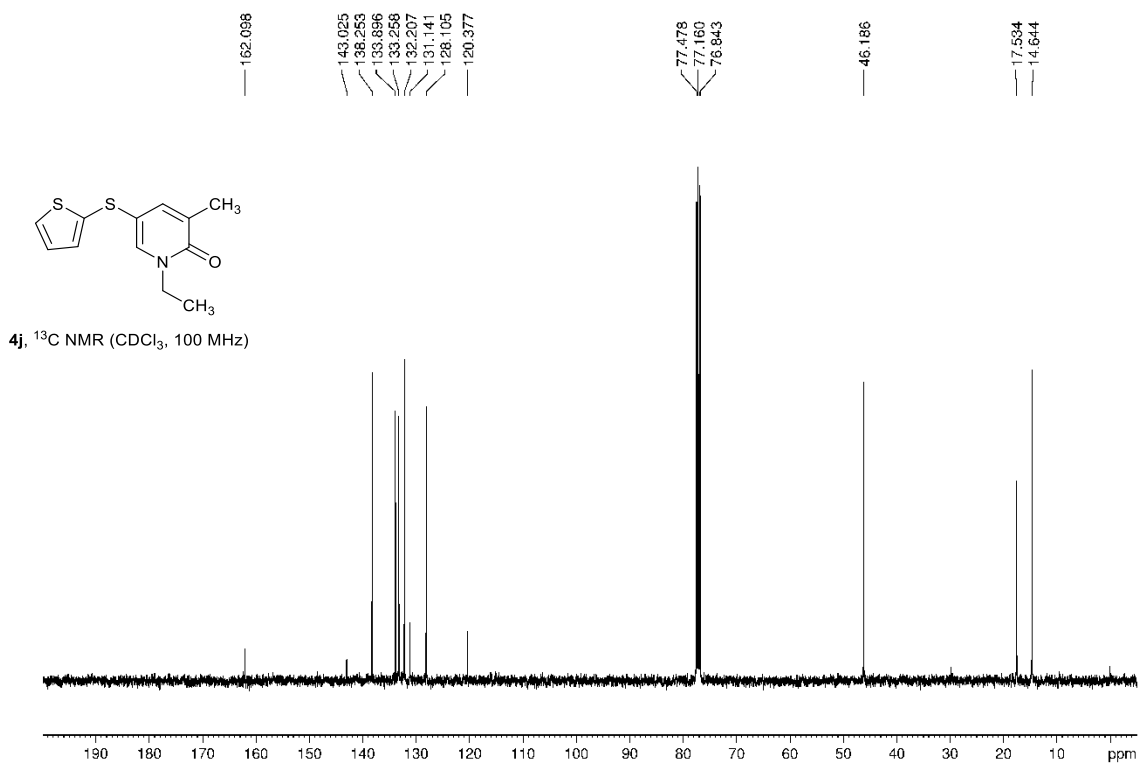

# 1-Ethyl-3-methyl-5-(propylthio)pyridin-2(1H)-one (4k)

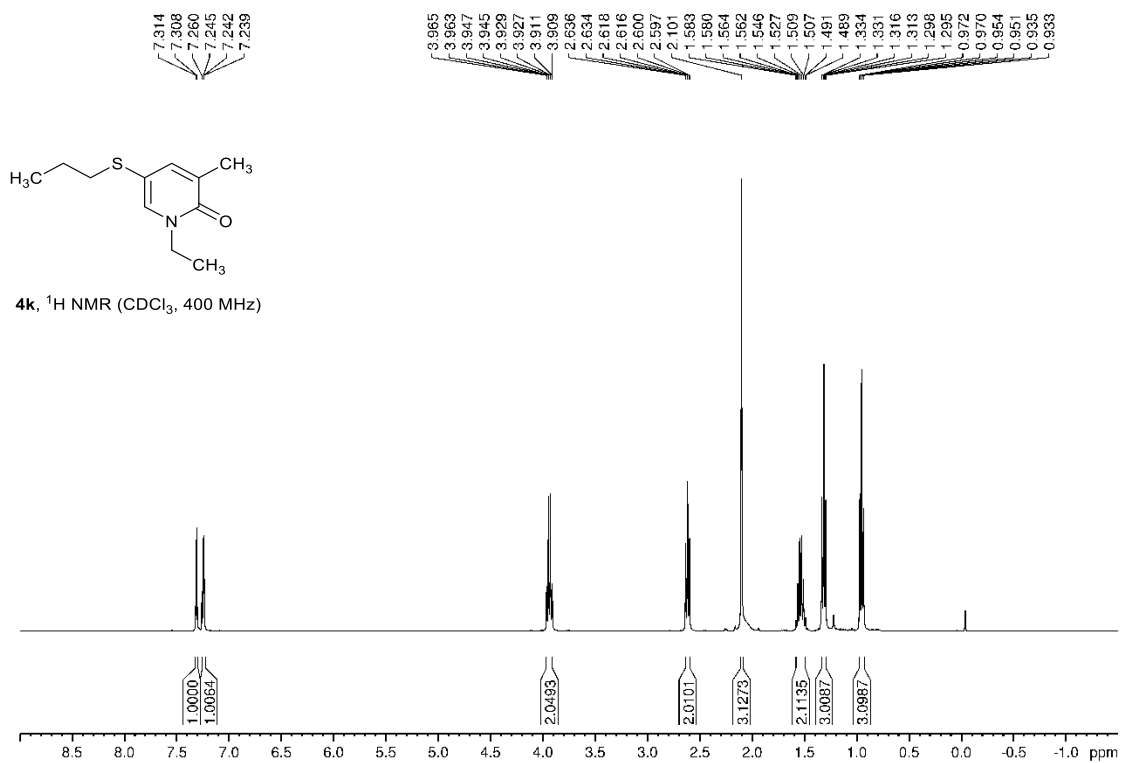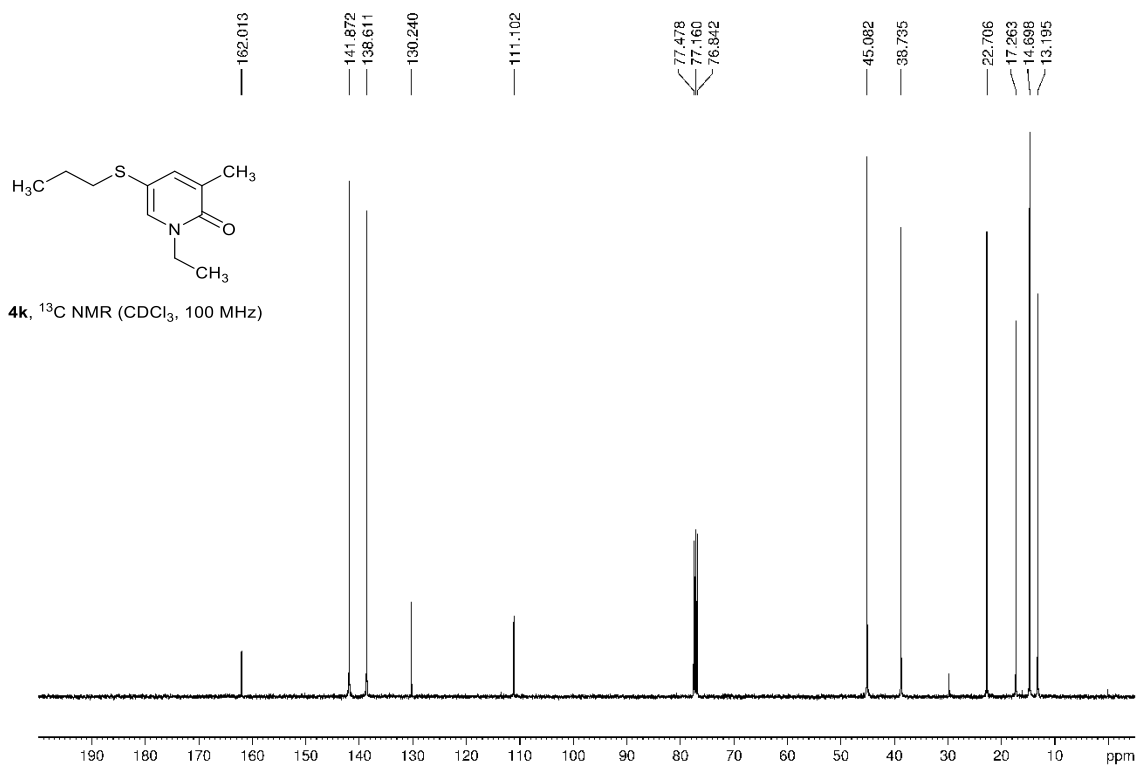

# 1-Ethyl-3-methyl-5-(phenylselanyl)pyridin-2(1H)-one (4I)

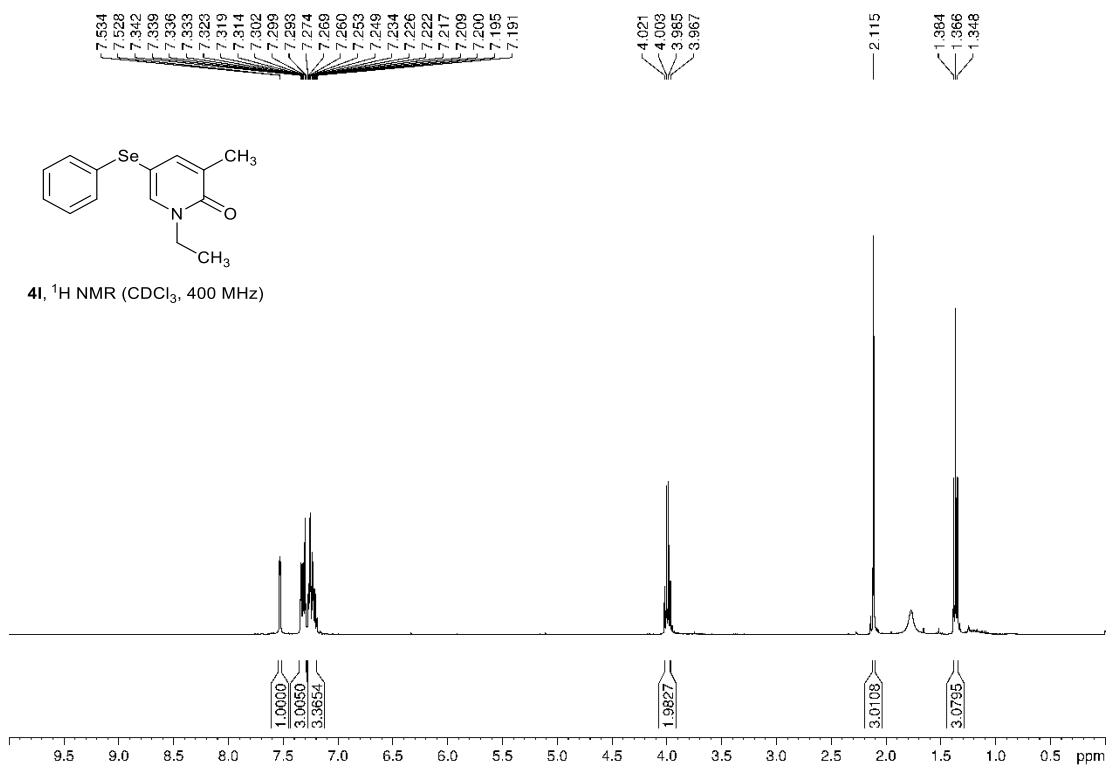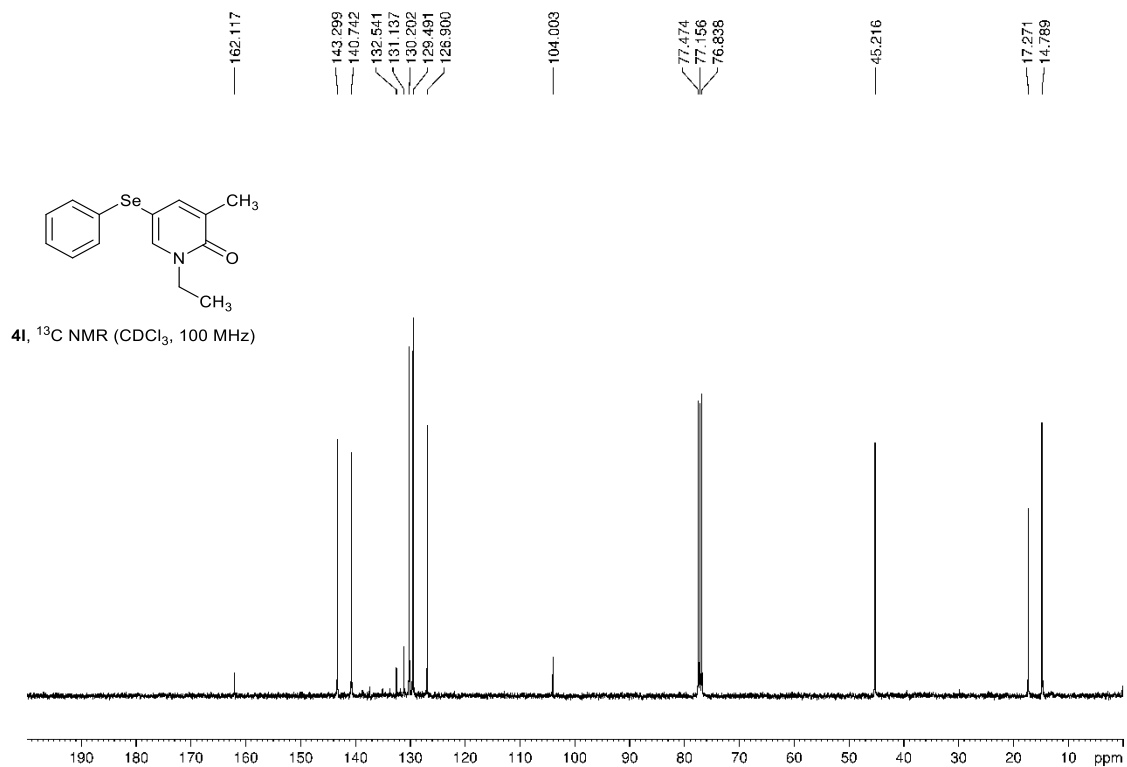

## 2-Benzyl-4-(phenylselanyl)isoquinolin-1(2H)-one (4m)

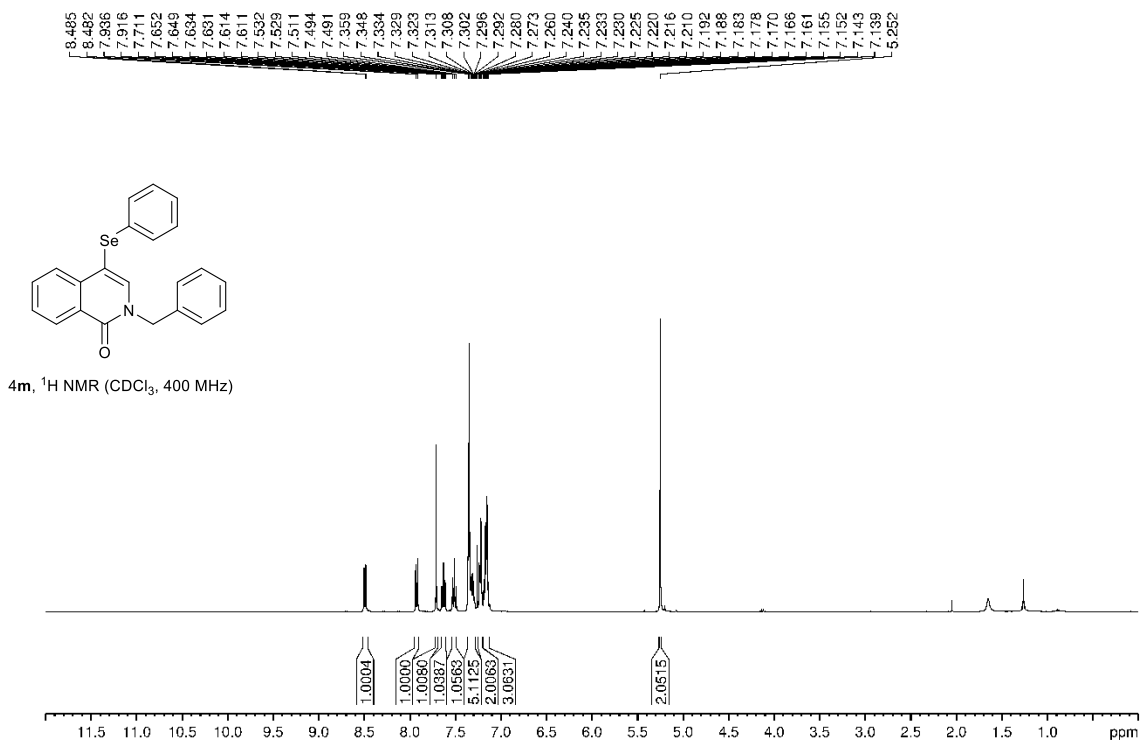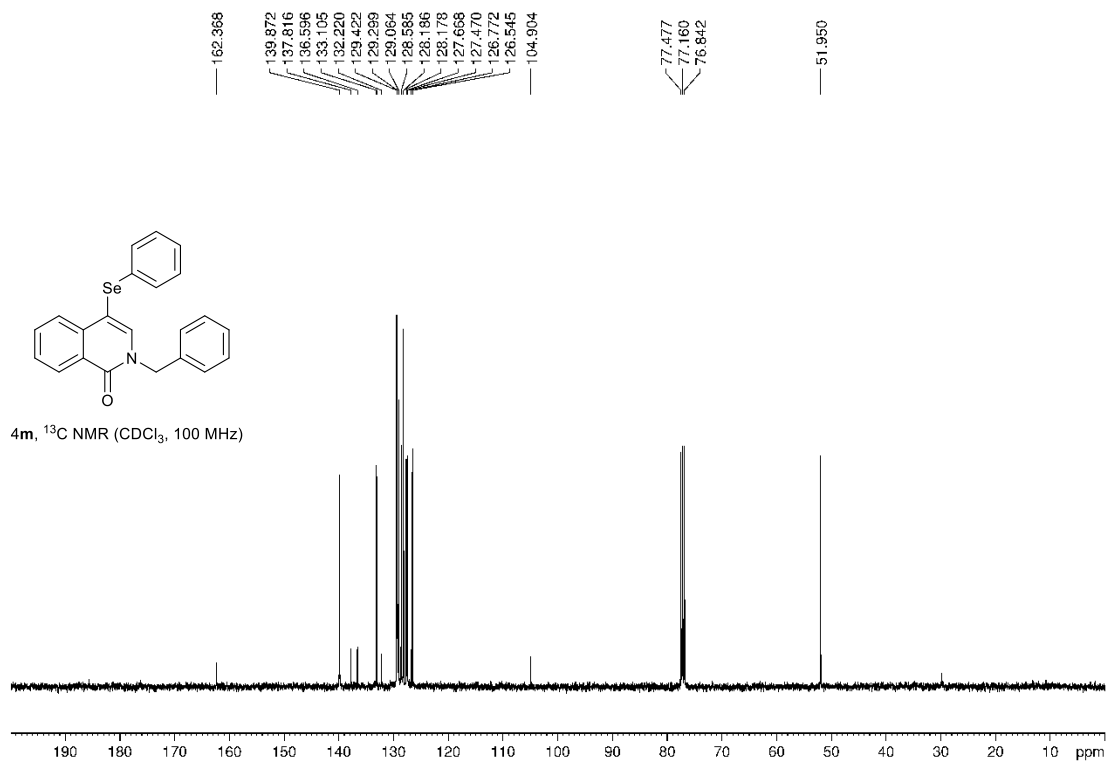

### 5-((4-Bromophenyl)thio)-1-ethyl-3-methylpyridin-2(1H)-one (4n)

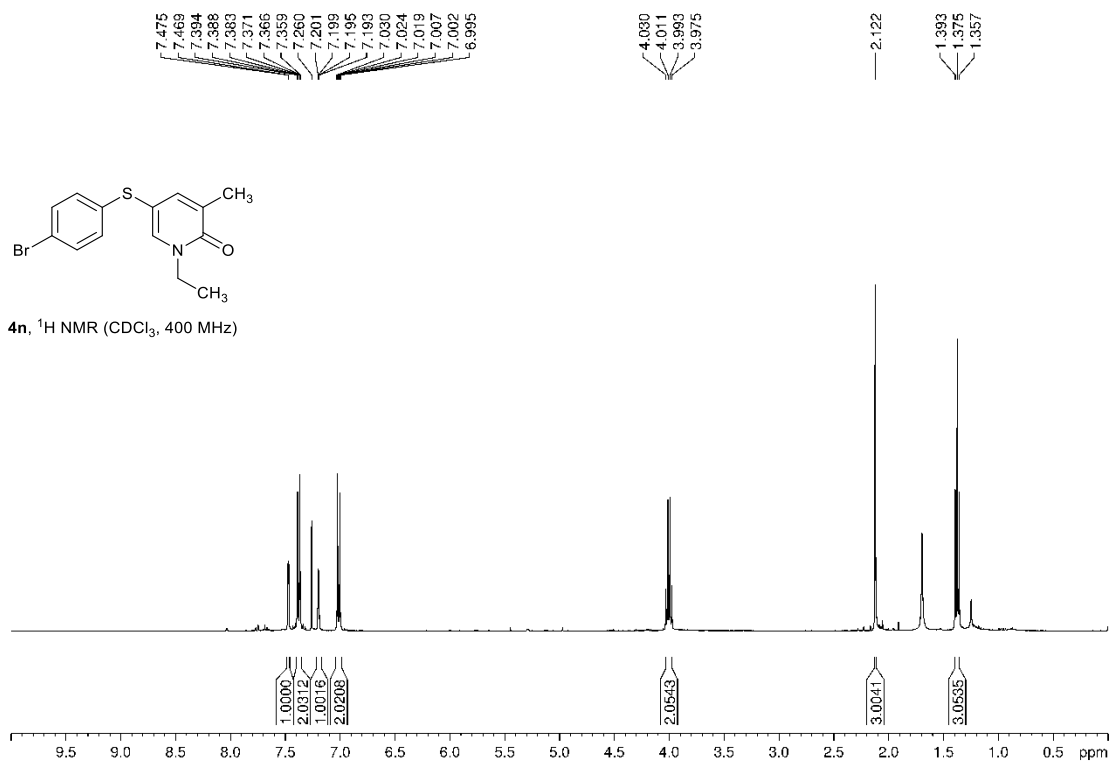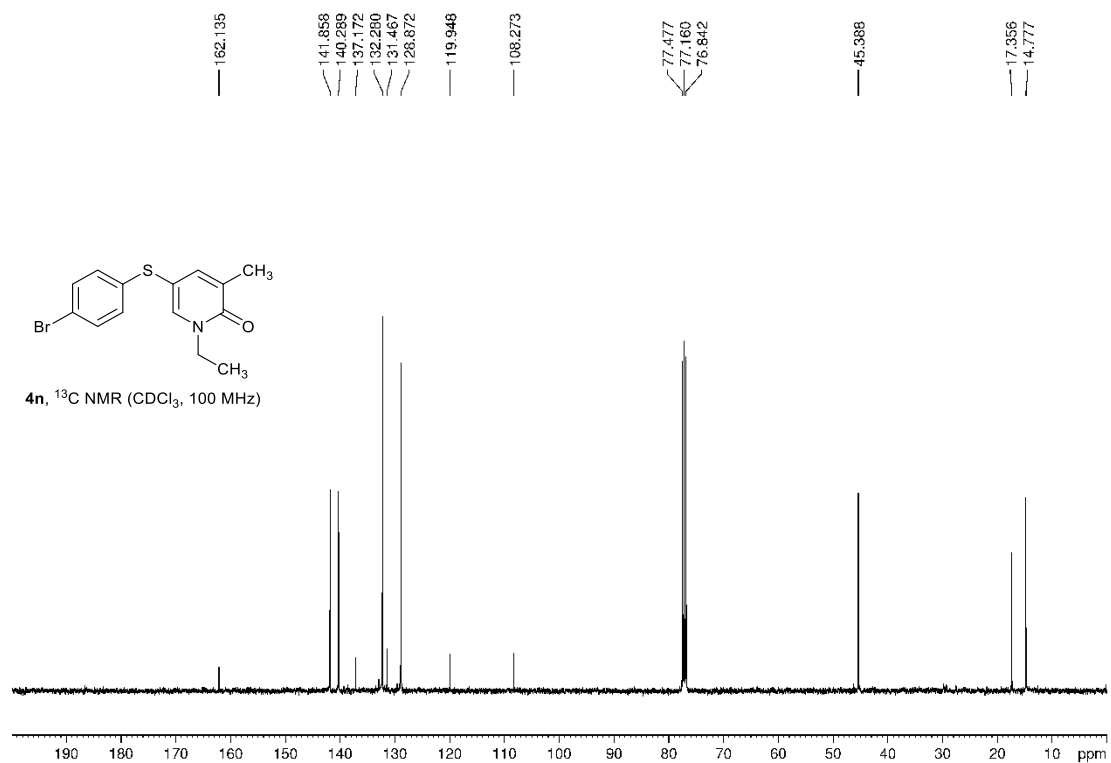

Supplement: c9ob01061k1.pdf [file c9ob01061k1.pdf]
